# Supplementary material
Source: ML conference proceedings conference paper supplement (https://proceedings.neurips.cc/paper_files/paper/2023/hash/2a50f08293e5f635655e8bec8f013d99-Abstract.html)
Supplement: Supplementary file 1 [file 2a50f08293e5f635655e8bec8f013d99-Supplemental-Conference.pdf]

## A Organization of the Appendices

In the Appendix, we give proofs of all results from the main text. In Appendix B, we study properties of square-root-Lipschitz functions and introduce some technical tools that we use throughout the appendix. In Appendix C, we prove our main uniform convergence guarantee (Theorem 1 and the more general version Theorem 6). In Appendix D, we obtain bounds on the minimal norm required to interpolate in the settings studied in section 5. In Appendix E, we provide details on the counterexample to Gaussian universality described in section 7.

## B Preliminaries

### B.1 Properties of Square-root Lipschitz Loss

In this section, we prove that square-root Lipschitzness can be equivalently characterized by a relationship between a function and its Moreau envelope, which can be used to establish uniform convergence results based on the recent work of Zhou et al. 2022. We formally define Lipschitz functions and Moreau envelope below.

**Definition 1.** A function  $f : \mathbb{R} \rightarrow \mathbb{R}$  is  $M$ -Lipschitz if for all  $x, y$  in  $\mathbb{R}$ ,

$$|f(x) - f(y)| \leq M|x - y|. \quad (33)$$

**Definition 2.** The Moreau envelope of a function  $f : \mathbb{R} \rightarrow \mathbb{R}$  associated with smoothing parameter  $\lambda \in \mathbb{R}_+$  is defined as

$$f_\lambda(x) := \inf_{y \in \mathbb{R}} f(y) + \lambda(y - x)^2. \quad (34)$$

Though we define Lipschitz functions and Moreau envelope for univariate functions from  $\mathbb{R}$  to  $\mathbb{R}$  above, we can easily extend definitions 1 and 2 to loss functions  $f : \mathbb{R} \times \mathcal{Y} \rightarrow \mathbb{R}$  or  $f : \mathbb{R} \times \mathcal{Y} \times \Theta \rightarrow \mathbb{R}$ . We say a function  $f : \mathbb{R} \times \mathcal{Y} \rightarrow \mathbb{R}$  is  $M$ -Lipschitz if for any  $y \in \mathcal{Y}$  and  $\hat{y}_1, \hat{y}_2 \in \mathbb{R}$ , we have

$$|f(\hat{y}_1, y) - f(\hat{y}_2, y)| \leq M|\hat{y}_1 - \hat{y}_2|.$$

Similarly, we say a function  $f : \mathbb{R} \times \mathcal{Y} \times \Theta \rightarrow \mathbb{R}$  is  $M$ -Lipschitz if for any  $y \in \mathcal{Y}, \theta \in \Theta$  and  $\hat{y}_1, \hat{y}_2 \in \mathbb{R}$ , we have

$$|f(\hat{y}_1, y, \theta) - f(\hat{y}_2, y, \theta)| \leq M|\hat{y}_1 - \hat{y}_2|.$$

We can also define the Moreau envelope of a function  $f : \mathbb{R} \times \mathcal{Y} \rightarrow \mathbb{R}$  by

$$f_\lambda(\hat{y}, y) := \inf_{u \in \mathbb{R}} f(u, y) + \lambda(u - \hat{y})^2,$$

and the Moreau envelope of a function  $f : \mathbb{R} \times \mathcal{Y} \times \Theta \rightarrow \mathbb{R}$  is defined as

$$f_\lambda(\hat{y}, y, \theta) := \inf_{u \in \mathbb{R}} f(u, y, \theta) + \lambda(u - \hat{y})^2.$$

The proof of all results in this section can be straightforwardly extended to these settings. For simplicity, we ignore the additional arguments in  $\mathcal{Y}$  and  $\Theta$  in this section.

The Moreau envelope is usually viewed as a smooth approximation to the original function  $f$ ; its minimizer is known as the proximal operator. It plays an important role in convex analysis (see e.g. Boyd et al. 2004; Bauschke, Combettes, et al. 2011; Rockafellar 1970), but is also useful and well-defined when  $f$  is nonconvex. The canonical example of a  $\sqrt{H}$ -square-root-Lipschitz function is  $f(x) = Hx^2$ , for which we can easily check

$$f_\lambda(x) = \frac{\lambda}{\lambda + H} f(x).$$

In proposition 1 below, we show that the condition  $f_\lambda \geq \frac{\lambda}{\lambda + H} f$  is exactly equivalent to  $\sqrt{H}$ -square-root-Lipschitzness.

**Proposition 1.** A function  $f : \mathbb{R} \rightarrow \mathbb{R}$  is non-negative and  $\sqrt{H}$ -square-root-Lipschitz if and only if for any  $x \in \mathbb{R}$  and  $\lambda \geq 0$ , it holds that

$$f_\lambda(x) \geq \frac{\lambda}{\lambda + H} f(x). \quad (35)$$

516 *Proof.* Suppose that equation (35) holds, then by taking  $\lambda = 0$  and the definition in equation (2), we  
 517 see that  $f$  must be non-negative. For an non-negative function  $f$ , we observe for any  $x \in \mathbb{R}$ , it holds  
 518 that

$$\begin{aligned}
 & \forall \lambda \geq 0, f_\lambda(x) \geq \frac{\lambda}{\lambda + H} f(x) \\
 & \iff \forall \lambda > 0, f_\lambda(x) \geq \frac{\lambda}{\lambda + H} f(x) \quad \text{since } f_\lambda \geq 0 \\
 & \iff \inf_{\lambda > 0} \frac{\lambda + H}{\lambda} f_\lambda(x) \geq f(x) \\
 & \iff \inf_{\lambda > 0} \frac{\lambda + H}{\lambda} \inf_{y \in \mathbb{R}} f(y) + \lambda(y - x)^2 \geq f(x) \quad \text{by equation (2)} \\
 & \iff \inf_{y \in \mathbb{R}} \inf_{\lambda > 0} \left(1 + \frac{H}{\lambda}\right) f(y) + (\lambda + H)(y - x)^2 \geq f(x) \\
 & \iff \inf_{y \in \mathbb{R}} f(y) + H(y - x)^2 + 2\sqrt{f(y)H(y - x)^2} \geq f(x) \quad \text{by } \lambda^* = \sqrt{\frac{Hf(y)}{(y - x)^2}} \\
 & \iff \forall y \in \mathbb{R}, (\sqrt{f(y)} + \sqrt{H}|y - x|)^2 \geq f(x) \\
 & \iff \forall y \in \mathbb{R}, \sqrt{H}|y - x| \geq \sqrt{f(x)} - \sqrt{f(y)} \quad \text{since } f \geq 0.
 \end{aligned}$$

519 Therefore,  $f$  must be  $\sqrt{H}$ -square-root-Lipschitz as well. Conversely, if  $f$  is non-negative and  
 520  $\sqrt{H}$ -square-root-Lipschitz, then the above implies that (2) must hold and we are done.  $\square$

521 Interestingly, there is a similar equivalent characterization for Lipschitz functions as well.

522 **Proposition 2.** A function  $f : \mathbb{R} \rightarrow \mathbb{R}$  is  $M$ -Lipschitz if and only if for any  $x \in \mathbb{R}$  and  $\lambda > 0$ , it holds  
 523 that

$$f_\lambda(x) \geq f(x) - \frac{M^2}{4\lambda}. \quad (36)$$

524 *Proof.* Observe that for any  $x \in \mathbb{R}$ , it holds that

$$\begin{aligned}
 & \forall \lambda > 0, f_\lambda(x) \geq f(x) - \frac{M^2}{4\lambda} \\
 & \iff \inf_{\lambda > 0} f_\lambda(x) + \frac{M^2}{4\lambda} \geq f(x) \\
 & \iff \inf_{\lambda > 0, y \in \mathbb{R}} f(y) + \lambda(y - x)^2 + \frac{M^2}{4\lambda} \geq f(x) \quad \text{by equation (2)} \\
 & \iff \inf_{y \in \mathbb{R}} f(y) + M|y - x| \geq f(x) \quad \text{by } \lambda^* = \frac{M}{2|y - x|} \\
 & \iff \forall y \in \mathbb{R}, M|y - x| \geq f(x) - f(y)
 \end{aligned}$$

525 and we are done.  $\square$

526 Finally, we show that any smooth loss is square-root-Lipschitz. Therefore, the class of square-root-  
 527 Lipschitz losses is more general than the class of smooth losses studied in Srebro et al. 2010.

528 **Definition 3.** A twice differentiable<sup>1</sup> function  $f : \mathbb{R} \rightarrow \mathbb{R}$  is  $H$ -smooth if for all  $x$  in  $\mathbb{R}$

$$|f''(x)| \leq H.$$

529 The following result is similar to to Lemma 2.1 in Srebro et al. 2010:

530 **Proposition 3.** Let  $f : \mathbb{R} \rightarrow \mathbb{R}$  be a  $H$ -smooth and non-negative function. Then for any  $x \in \mathbb{R}$ , it  
 531 holds that

$$|f'(x)| \leq \sqrt{2Hf(x)}.$$

532 Therefore,  $\sqrt{f}$  is  $\sqrt{H/2}$ -Lipschitz.

<sup>1</sup>The definition of smoothness can be stated without twice differentiability, by instead requiring the gradient to be Lipschitz. We make this assumption here simply for convenience.

533 *Proof.* Since  $f$  is  $H$ -smooth and non-negative, by Taylor's theorem, for any  $x, y \in \mathbb{R}$ , we have

$$\begin{aligned} 0 &\leq f(y) \\ &= f(x) + f'(x)(y-x) + \frac{f''(a)}{2}(y-x)^2 \\ &\leq f(x) + f'(x)(y-x) + \frac{H}{2}(y-x)^2 \end{aligned}$$

534 where  $a \in [\min(x, y), \max(x, y)]$ . Setting  $y = x - \frac{f'(x)}{H}$  yields the desired bound. To show that  $\sqrt{f}$   
535 is Lipschitz, we observe that for any  $x \in \mathbb{R}$

$$\left| \frac{d}{dx} \sqrt{f(x)} \right| = \left| \frac{f'(x)}{2\sqrt{f(x)}} \right| \leq \sqrt{H/2}$$

536 and so we apply Taylor's theorem again to show that

$$|\sqrt{f(x)} - \sqrt{f(y)}| \leq \sqrt{H/2} |x - y|$$

537 which is the desired definition.  $\square$

## 538 B.2 Properties of Gaussian Distribution

539 We will make use of the following results without proof.

540 **Gaussian Minimax Theorem.** Our proof of Theorem 1 and 6 will closely follow prior works that  
541 apply Gaussian Minimax Theorem (GMT) to uniform convergence (Koehler et al. 2021; Zhou et al.  
542 2021; Zhou et al. 2022; Wang et al. 2021; Donhauser et al. 2022). The following result is Theorem 3  
543 of Thrampoulidis et al. 2015 (see also Theorem 1 in the same reference). As explained there, it is a  
544 consequence of the main result of Gordon (1985), known as Gordon's Theorem.

545 **Theorem 7** (Thrampoulidis et al. 2015; Gordon 1985). *Let  $Z : n \times d$  be a matrix with i.i.d.  $\mathcal{N}(0, 1)$   
546 entries and suppose  $G \sim \mathcal{N}(0, I_n)$  and  $H \sim \mathcal{N}(0, I_d)$  are independent of  $Z$  and each other. Let  
547  $S_w, S_u$  be compact sets and  $\psi : S_w \times S_u \rightarrow \mathbb{R}$  be an arbitrary continuous function. Define the  
548 Primary Optimization (PO) problem*

$$\Phi(Z) := \min_{w \in S_w} \max_{u \in S_u} \langle u, Zw \rangle + \psi(w, u) \quad (37)$$

549 and the Auxiliary Optimization (AO) problem

$$\phi(G, H) := \min_{w \in S_w} \max_{u \in S_u} \|w\|_2 \langle G, u \rangle + \|u\|_2 \langle H, w \rangle + \psi(w, u). \quad (38)$$

550 Under these assumptions,  $\Pr(\Phi(Z) < c) \leq 2 \Pr(\phi(G, H) \leq c)$  for any  $c \in \mathbb{R}$ .

551 Furthermore, if we suppose that  $S_w, S_u$  are convex sets and  $\psi(w, u)$  is convex in  $w$  and concave in  $u$ ,  
552 then  $\Pr(\Phi(Z) > c) \leq 2 \Pr(\phi(G, H) \geq c)$ .

553 GMT is an extremely useful tool because it allows us to convert a problem involving a random  
554 matrix into a problem involving only two random vectors. In our analysis, we will make use of a  
555 slightly more general version of Theorem 7, introduced by Koehler et al. (2021), to include additional  
556 variables which only affect the deterministic term in the minmax problem.

557 **Theorem 8** (Variant of GMT). *Let  $Z : n \times d$  be a matrix with i.i.d.  $\mathcal{N}(0, 1)$  entries and suppose  
558  $G \sim \mathcal{N}(0, I_n)$  and  $H \sim \mathcal{N}(0, I_d)$  are independent of  $Z$  and each other. Let  $S_W, S_U$  be compact  
559 sets in  $\mathbb{R}^d \times \mathbb{R}^{d'}$  and  $\mathbb{R}^n \times \mathbb{R}^{n'}$  respectively, and let  $\psi : S_W \times S_U \rightarrow \mathbb{R}$  be an arbitrary continuous  
560 function. Define the Primary Optimization (PO) problem*

$$\Phi(Z) := \min_{(w, w') \in S_W} \max_{(u, u') \in S_U} \langle u, Zw \rangle + \psi((w, w'), (u, u')) \quad (39)$$

561 and the Auxiliary Optimization (AO) problem

$$\phi(G, H) := \min_{(w, w') \in S_W} \max_{(u, u') \in S_U} \|w\|_2 \langle G, u \rangle + \|u\|_2 \langle H, w \rangle + \psi((w, w'), (u, u')). \quad (40)$$

562 Under these assumptions,  $\Pr(\Phi(Z) < c) \leq 2 \Pr(\phi(G, H) \leq c)$  for any  $c \in \mathbb{R}$ .

Theorem 8 requires  $S_W$  and  $S_U$  to be compact. However, we can usually get around the compactness requirement by a truncation argument.

**Lemma 1** (Zhou et al. 2022, Lemma 6). *Let  $f : \mathbb{R}^d \rightarrow \mathbb{R}$  be an arbitrary function and  $S_r^d = \{x \in \mathbb{R}^d : \|x\|_2 \leq r\}$ , then for any set  $\mathcal{K}$ , it holds that*

$$\lim_{r \rightarrow \infty} \sup_{w \in \mathcal{K} \cap S_r^d} f(w) = \sup_{w \in \mathcal{K}} f(w). \quad (41)$$

If  $f$  is a random function, then for any  $t \in \mathbb{R}$

$$\Pr \left( \sup_{w \in \mathcal{K}} f(w) > t \right) = \lim_{r \rightarrow \infty} \Pr \left( \sup_{w \in \mathcal{K} \cap S_r^d} f(w) > t \right). \quad (42)$$

**Lemma 2** (Zhou et al. 2022, Lemma 7). *Let  $\mathcal{K}$  be a compact set and  $f, g$  be continuous real-valued functions on  $\mathbb{R}^d$ . Then it holds that*

$$\lim_{r \rightarrow \infty} \sup_{w \in \mathcal{K}} \inf_{0 \leq \lambda \leq r} \lambda f(w) + g(w) = \sup_{w \in \mathcal{K} : f(w) \geq 0} g(w). \quad (43)$$

If  $f$  and  $g$  are random functions, then for any  $t \in \mathbb{R}$

$$\Pr \left( \sup_{w \in \mathcal{K} : f(w) \geq 0} g(w) \geq t \right) = \lim_{r \rightarrow \infty} \Pr \left( \sup_{w \in \mathcal{K}} \inf_{0 \leq \lambda \leq r} \lambda f(w) + g(w) \geq t \right). \quad (44)$$

**Concentration inequalities.** Let  $\sigma_{\min}(A)$  denote the minimum singular value of an arbitrary matrix  $A$ , and  $\sigma_{\max}$  the maximum singular value. We use  $\|A\|_{op} = \sigma_{\max}(A)$  to denote the operator norm of matrix  $A$ . The following concentration results for Gaussian vector and matrix are standard.

**Lemma 3** (Special case of Theorem 3.1.1 of Vershynin 2018). *Suppose that  $Z \sim \mathcal{N}(0, I_n)$ . Then*

$$\Pr(|\|Z\|_2 - \sqrt{n}| \geq t) \leq 4e^{-t^2/4}. \quad (45)$$

**Lemma 4** (Koehler et al. 2021, Lemma 10). *For any covariance matrix  $\Sigma$  and  $H \sim \mathcal{N}(0, I_d)$ , with probability at least  $1 - \delta$ , it holds that*

$$1 - \frac{\|\Sigma^{1/2}H\|_2^2}{\text{Tr}(\Sigma)} \lesssim \frac{\log(4/\delta)}{\sqrt{R(\Sigma)}} \quad (46)$$

and

$$\|\Sigma H\|_2^2 \lesssim \log(4/\delta) \text{Tr}(\Sigma^2). \quad (47)$$

Therefore, provided that  $R(\Sigma) \gtrsim \log(4/\delta)^2$ , it holds that

$$\left( \frac{\|\Sigma H\|_2}{\|\Sigma^{1/2}H\|_2} \right)^2 \lesssim \log(4/\delta) \frac{\text{Tr}(\Sigma^2)}{\text{Tr}(\Sigma)}. \quad (48)$$

**Theorem 9** (Vershynin 2010, Corollary 5.35). *Let  $n, N \in \mathbb{N}$ . Let  $A \in \mathbb{R}^{N \times n}$  be a random matrix with entries i.i.d.  $\mathcal{N}(0, 1)$ . Then for any  $t > 0$ , it holds with probability at least  $1 - 2\exp(-t^2/2)$  that*

$$\sqrt{N} - \sqrt{n} - t \leq \sigma_{\min}(A) \leq \sigma_{\max}(A) \leq \sqrt{N} + \sqrt{n} + t. \quad (49)$$

**Conditional Distribution of Gaussian.** To handle arbitrary multi-index conditional distributions of  $y$  given by assumption (B), we will apply a conditioning argument. After conditioning on  $W^T x$  and  $\xi$ , the response  $y$  is no longer random. Importantly, the conditional distribution of  $x$  remains Gaussian (though with a different mean and covariance) and so we can still apply GMT. In the lemma below,  $Z \in \mathbb{R}^{n \times d}$  is a random matrix with i.i.d.  $\mathcal{N}(0, 1)$  entries and  $X = Z\Sigma^{1/2}$ .

**Lemma 5** (Zhou et al. 2022, Lemma 4). *Fix any integer  $k < d$  and any  $k$  vectors  $w_1^*, \dots, w_k^*$  in  $\mathbb{R}^d$  such that  $\Sigma^{1/2}w_1^*, \dots, \Sigma^{1/2}w_k^*$  are orthonormal. Denoting*

$$P = I_d - \sum_{i=1}^k (\Sigma^{1/2}w_i^*)(\Sigma^{1/2}w_i^*)^T, \quad (50)$$

the distribution of  $X$  conditional on  $Xw_1^* = \eta_1, \dots, Xw_k^* = \eta_k$  is the same as that of

$$\sum_{i=1}^k \eta_i (\Sigma w_i^*)^T + ZP\Sigma^{1/2}. \quad (51)$$

### B.3 Vapnik-Chervonenkis (VC) theory

By the conditioning step mentioned above, we will separate  $x$  into a low-dimensional component  $W^T x$  and the independent component  $Q^T x$ . Concentration results for the low-dimensional component can be easily established using VC theory. As mentioned in Zhou et al. 2022, low-dimensional concentration can be established using alternative results (e.g., Vapnik 1982; Panchenko 2002; Panchenko 2003; Mendelson 2017).

Recall the following definition of VC-dimension from Shalev-Shwartz and Ben-David (2014).

**Definition 4.** Let  $\mathcal{H}$  be a class of functions from  $\mathcal{X}$  to  $\{0, 1\}$  and let  $C = \{c_1, \dots, c_m\} \subset \mathcal{X}$ . The restriction of  $\mathcal{H}$  to  $C$  is

$$\mathcal{H}_C = \{(h(c_1), \dots, h(c_m)) : h \in \mathcal{H}\}.$$

A hypothesis class  $\mathcal{H}$  *shatters* a finite set  $C \subset \mathcal{X}$  if  $|\mathcal{H}_C| = 2^{|C|}$ . The VC-dimension of  $\mathcal{H}$  is the maximal size of a set that can be shattered by  $\mathcal{H}$ . If  $\mathcal{H}$  can shatter sets of arbitrary large size, we say  $\mathcal{H}$  has infinite VC-dimension.

Also, we have the following well-known result for the class of nonhomogenous halfspaces in  $\mathbb{R}^d$  (Theorem 9.3 of Shalev-Shwartz and Ben-David (2014)), and the result on VC-dimension of the union of two hypothesis classes (Lemma 3.2.3 of Blumer et al. (1989)):

**Theorem 10.** *The class  $\{x \mapsto \text{sign}(\langle w, x \rangle + b) : w \in \mathbb{R}^d, b \in \mathbb{R}\}$  has VC-dimension  $d + 1$ .*

**Theorem 11.** *Let  $\mathcal{H}$  a hypothesis classes of finite VC-dimension  $d \geq 1$ . Let  $\mathcal{H}_2 := \{\max(h_1, h_2) : h_1, h_2 \in \mathcal{H}\}$  and  $\mathcal{H}_3 := \{\min(h_1, h_2) : h_1, h_2 \in \mathcal{H}\}$ . Then, both the VC-dimension of  $\mathcal{H}_2$  and the VC-dimension of  $\mathcal{H}_3$  are  $O(d)$ .*

By combining Theorem 10 and 11, we can easily verify the VC assumption in Corollary 1 for the phase retrieval loss  $f(\hat{y}, y) = (|\hat{y}| - y)^2$ . Similar results can be proven for ReLU regression. To verify the VC assumption for single-index neural nets in Corollary 2, we can use the following result (equation 2 of Bartlett et al. (2019)):

**Theorem 12.** *The VC-dimension of a neural network with piecewise linear activation function,  $W$  parameters, and  $L$  layers has VC-dimension  $O(WL \log W)$ .*

We can easily establish low-dimensional concentration due to the following result:

**Theorem 13** (Vapnik 1982, Special case of Assertion 4 in Chapter 7.8; see also Theorem 7.6). *Suppose that the loss function  $l : \mathcal{Z} \times \Theta \rightarrow \mathbb{R}_{\geq 0}$  satisfies*

(i) *for every  $\theta \in \Theta$ , the function  $l(\cdot, \theta)$  is measurable with respect to the first argument*

(ii) *the class of functions  $\{z \mapsto \mathbb{1}\{l(z, \theta) > t\} : (\theta, t) \in \Theta \times \mathbb{R}\}$  has VC-dimension at most  $h$*

*and the distribution  $\mathcal{D}$  over  $\mathcal{Z}$  satisfies for every  $\theta \in \Theta$*

$$\frac{\mathbb{E}_{z \sim \mathcal{D}}[l(z, \theta)^4]^{1/4}}{\mathbb{E}_{z \sim \mathcal{D}}[l(z, \theta)]} \leq \tau, \quad (52)$$

*then for any  $n > h$ , with probability at least  $1 - \delta$  over the choice of  $(z_1, \dots, z_n) \sim \mathcal{D}^n$ , it holds uniformly over all  $\theta \in \Theta$  that*

$$\frac{1}{n} \sum_{i=1}^n l(z_i, \theta) \geq \left(1 - 8\tau \sqrt{\frac{h(\log(2n/h) + 1) + \log(12/\delta)}{n}}\right) \mathbb{E}_{z \sim \mathcal{D}}[l(z, \theta)]. \quad (53)$$

## C Proof of Theorem 6

It is clear that Theorem 1 is a special case of Theorem 6. Therefore, we will prove the more general result here.

**Notation.** Following the tradition in statistics, we denote  $X = (x_1, \dots, x_n)^T \in \mathbb{R}^{n \times d}$  as the design matrix. In the proof section, we slightly abuse the notation of  $\eta_i$  to mean  $Xw_i^*$  and  $\xi$  to mean the  $n$ -dimensional random vector whose  $i$ -th component satisfies  $y_i = g(\eta_{1,i}, \dots, \eta_{k,i}, \xi_i)$ . We will write  $X = Z\Sigma^{1/2}$  where  $Z$  is a random matrix with i.i.d. standard normal entries if  $\mu = 0$ .

Throughout this section, we can first assume  $\mu = 0$  in Assumption (A) without loss of generality because if we define  $\tilde{f} : \mathbb{R} \times \mathcal{Y} \times \Theta \rightarrow \mathbb{R}$  by

$$\tilde{f}(\hat{y}, y, \theta) := f(\hat{y} + \langle w(\theta), \mu \rangle, y, \theta), \quad (54)$$

then by definition, it holds that

$$f(\langle w(\theta), x \rangle, y, \theta) = \tilde{f}(\langle w(\theta), x - \mu \rangle, y, \theta)$$

and so we can apply the theory on  $\tilde{f}$  first and then translate to the problem on  $f$ . Similarly, we can also assume  $\Sigma^{1/2}w_1^*, \dots, \Sigma^{1/2}w_k^*$  are orthonormal without loss of generality. This is because we can denote  $W \in \mathbb{R}^{d \times k}$  by  $W = [w_1^*, \dots, w_k^*]$  and let  $\tilde{W} = W(W^T \Sigma W)^{-1/2}$ . By definition, it holds that  $\tilde{W}^T \Sigma \tilde{W} = I$  and so the columns of  $\tilde{W} = [\tilde{w}_1^*, \dots, \tilde{w}_k^*]$  satisfy  $\Sigma^{1/2}\tilde{w}_1^*, \dots, \Sigma^{1/2}\tilde{w}_k^*$  are orthonormal. If we define  $\tilde{g} : \mathbb{R}^{k+1} \rightarrow \mathbb{R}$  by

$$\tilde{g}(\eta_1, \dots, \eta_k, \xi) = g([\eta_1, \dots, \eta_k](W^T \Sigma W)^{1/2} + \mu^T W, \xi), \quad (55)$$

then  $y = \tilde{g}(x^T \tilde{W}, \xi)$  and so we can apply the theory on  $\tilde{g}$ .

We will write the generalization problem as a Primary Optimization problem in Theorem 8. For generality, we will let  $F$  be any deterministic function and then choose it in the end.

**Lemma 6.** Fix an arbitrary set  $\Theta \subseteq \mathbb{R}^p$  and let  $F : \Theta \rightarrow \mathbb{R}$  be any deterministic and continuous function. Consider dataset  $(X, Y)$  drawn i.i.d. from the data distribution  $\mathcal{D}$  according to (A) and (B) with  $\mu = 0$  and orthonormal  $\Sigma^{1/2}w_1^*, \dots, \Sigma^{1/2}w_k^*$ . Then conditioned on  $Xw_1^* = \eta_1, \dots, Xw_k^* = \eta_k$  and  $\xi$ , if we define

$$\Phi := \sup_{\substack{(w, u, \theta) \in \mathbb{R}^d \times \mathbb{R}^n \times \Theta \\ w = P \Sigma^{1/2} w(\theta)}} \inf_{\lambda \in \mathbb{R}^n} \langle \lambda, Zw \rangle + \psi(u, \theta, \lambda | \eta_1, \dots, \eta_k, \xi) \quad (56)$$

where  $P$  is defined in (50) and  $\psi$  is a deterministic and continuous function given by

$$\begin{aligned} \psi(u, \theta, \lambda | \eta_1, \dots, \eta_k, \xi) &= F(\theta) - \frac{1}{n} \sum_{i=1}^n f(u_i, g(\eta_{1,i}, \dots, \eta_{k,i}, \xi_i), \theta) \\ &\quad + \langle \lambda, \left( \sum_{i=1}^k \eta_i (\Sigma w_i^*)^T \right) w(\theta) - u \rangle, \end{aligned} \quad (57)$$

then it holds that for any  $t \in \mathbb{R}$ , we have

$$\Pr \left( \sup_{\theta \in \Theta} F(\theta) - \hat{L}(\theta) > t \mid \eta_1, \dots, \eta_k, \xi \right) = \Pr(\Phi > t). \quad (58)$$

*Proof.* By introducing a variable  $u = Xw(\theta)$ , we have

$$\begin{aligned} \sup_{\theta \in \Theta} F(\theta) - \hat{L}(\theta) &= \sup_{\theta \in \Theta} F(\theta) - \frac{1}{n} \sum_{i=1}^n f(\langle w(\theta), x_i \rangle, y_i, \theta) \\ &= \sup_{\theta \in \Theta, u \in \mathbb{R}^n} \inf_{\lambda \in \mathbb{R}^n} \langle \lambda, Xw(\theta) - u \rangle + F(\theta) - \frac{1}{n} \sum_{i=1}^n f(u_i, y_i, \theta). \end{aligned}$$

Conditioned on  $Xw_1^* = \eta_1, \dots, Xw_k^* = \eta_k$  and  $\xi$ , the above is only random in  $X$  by our multi-index model assumption on  $y$ . By Lemma 5, the above is equal in law to

$$\begin{aligned} &\sup_{\theta \in \Theta, u \in \mathbb{R}^n} \inf_{\lambda \in \mathbb{R}^n} \langle \lambda, \left( \sum_{i=1}^k \eta_i (\Sigma w_i^*)^T + ZP \Sigma^{1/2} \right) w(\theta) - u \rangle + F(\theta) - \frac{1}{n} \sum_{i=1}^n f(u_i, y_i, \theta) \\ &= \sup_{\theta \in \Theta, u \in \mathbb{R}^n} \inf_{\lambda \in \mathbb{R}^n} \langle \lambda, (ZP \Sigma^{1/2}) w(\theta) \rangle + \psi(u, \theta, \lambda | \eta_1, \dots, \eta_k, \xi) \\ &= \sup_{\substack{(w, u, \theta) \in \mathbb{R}^d \times \mathbb{R}^n \times \Theta \\ w = P \Sigma^{1/2} w(\theta)}} \inf_{\lambda \in \mathbb{R}^n} \langle \lambda, Zw \rangle + \psi(u, \theta, \lambda | \eta_1, \dots, \eta_k, \xi) \\ &= \Phi. \end{aligned}$$

The function  $\psi$  is continuous because we require  $F, f$  and  $w$  to be continuous in the definitions.  $\square$

Next, we are ready to apply Gaussian Minimax Theorem. Although the domains in (56) are not compact, we can use the truncation lemmas 1 and 2 in Appendix B.

**Lemma 7.** *In the same setting as Lemma 6, define the auxiliary problem as*

$$\Psi := \sup_{(u, \theta) \in \mathbb{R}^n \times \Theta} F(\theta) - \frac{1}{n} \sum_{i=1}^n f(u_i, y_i, \theta) \quad (59)$$

$$\langle H, P\Sigma^{1/2}w(\theta) \rangle \geq \left\| P\Sigma^{1/2}w(\theta) \right\|_2 G + \sum_{i=1}^k \langle w(\theta), \Sigma w_i^* \rangle \eta_i - u \Big\|_2$$

then for any  $t \in \mathbb{R}$ , it holds that

$$\Pr \left( \sup_{\theta \in \mathcal{K}} F(\theta) - \hat{L}(\theta) > t \right) \leq 2 \Pr(\Psi \geq t). \quad (60)$$

where the randomness in the second probability is taken over  $G, H, \eta_1, \dots, \eta_k$  and  $\xi$ .

*Proof.* Denote  $\mathcal{S}_r = \{(w, u, \theta) \in \mathbb{R}^d \times \mathbb{R}^n \times \Theta : w = P\Sigma^{1/2}w(\theta) \text{ and } \|w\|_2 + \|u\|_2 + \|\theta\|_2 \leq r\}$ . The set  $\mathcal{S}_r$  is bounded by definition and closed by the continuity of  $w$ . Hence, it is compact. Next, we denote the truncated problems:

$$\Phi_r := \sup_{(w, u, \theta) \in \mathcal{S}_r} \inf_{\lambda \in \mathbb{R}^n} \langle \lambda, Zw \rangle + \psi(u, \theta, \lambda \mid \eta_1, \dots, \eta_k, \xi) \quad (61)$$

659

$$\Phi_{r,s} := \sup_{(w, u, \theta) \in \mathcal{S}_r} \inf_{\|\lambda\|_2 \leq s} \langle \lambda, Zw \rangle + \psi(u, \theta, \lambda \mid \eta_1, \dots, \eta_k, \xi). \quad (62)$$

By definition, we have  $\Phi_r \leq \Phi_{r,s}$  and so

$$\Pr(\Phi_r > t) \leq \Pr(\Phi_{r,s} > t).$$

The corresponding auxiliary problems are

$$\begin{aligned} \Psi_{r,s} &:= \sup_{(w, u, \theta) \in \mathcal{S}_r} \inf_{\|\lambda\|_2 \leq s} \|\lambda\|_2 \langle H, w \rangle + \|w\|_2 \langle G, \lambda \rangle + \psi(u, \theta, \lambda \mid \eta_1, \dots, \eta_k, \xi) \\ &= \sup_{(w, u, \theta) \in \mathcal{S}_r} \inf_{\|\lambda\|_2 \leq s} \|\lambda\|_2 \langle H, w \rangle + \langle \lambda, \|w\|_2 G + \sum_{i=1}^k \eta_i \langle w(\theta), \Sigma w_i^* \rangle - u \rangle \\ &\quad + F(\theta) - \frac{1}{n} \sum_{i=1}^n f(u_i, g(\eta_{1,i}, \dots, \eta_{k,i}, \xi_i), \theta) \\ &= \sup_{(w, u, \theta) \in \mathcal{S}_r} \inf_{0 \leq \lambda \leq s} \lambda \left( \langle H, w \rangle - \left\| \|w\|_2 G + \sum_{i=1}^k \eta_i \langle w(\theta), \Sigma w_i^* \rangle - u \right\|_2 \right) \\ &\quad + F(\theta) - \frac{1}{n} \sum_{i=1}^n f(u_i, g(\eta_{1,i}, \dots, \eta_{k,i}, \xi_i), \theta) \end{aligned}$$

and the limit of  $s \rightarrow \infty$ :

$$\Psi_r := \sup_{(w, u, \theta) \in \mathcal{S}_r} F(\theta) - \frac{1}{n} \sum_{i=1}^n f(u_i, g(\eta_{1,i}, \dots, \eta_{k,i}, \xi_i), \theta)$$

$$\langle H, w \rangle \geq \left\| \|w\|_2 G + \sum_{i=1}^k \eta_i \langle w(\theta), \Sigma w_i^* \rangle - u \right\|_2$$

By definition, it holds that  $\Psi_r \leq \Psi$  and so

$$\Pr(\Psi_r \geq t) \leq \Pr(\Psi \geq t).$$

Thus, it holds that

$$\begin{aligned} \Pr(\Phi > t) &= \lim_{r \rightarrow \infty} \Pr(\Phi_r > t) && \text{by Lemma 1} \\ &\leq \lim_{r \rightarrow \infty} \lim_{s \rightarrow \infty} \Pr(\Phi_{r,s} > t) \\ &\leq 2 \lim_{r \rightarrow \infty} \lim_{s \rightarrow \infty} \Pr(\Psi_{r,s} \geq t) && \text{by Theorem 8} \\ &= 2 \lim_{r \rightarrow \infty} \Pr(\Psi_r \geq t) && \text{by Lemma 2} \\ &\leq 2 \Pr(\Psi \geq t). \end{aligned}$$

The proof concludes by applying Lemma 6 and the tower law.  $\square$

666 The following two simple lemmas will be useful to analyze the auxiliary problem.

667 **Lemma 8.** For  $a, b, H > 0$ , we have

$$\sup_{\lambda \geq 0} -\lambda a + \frac{\lambda}{H + \lambda} b = (\sqrt{b} - \sqrt{Ha})_+^2.$$

668 *Proof.* Observe that

$$\sup_{\lambda \geq 0} -\lambda a + \frac{\lambda}{H + \lambda} b = b - \inf_{\lambda \geq 0} \lambda a + \frac{H}{H + \lambda} b.$$

669 Define  $f(\lambda) = \lambda a + \frac{H}{H + \lambda} b$ , then

$$\begin{aligned} f'(\lambda) = a - \frac{Hb}{(H + \lambda)^2} \leq 0 &\iff (H + \lambda)^2 \leq \frac{Hb}{a} \\ &\iff -\sqrt{\frac{Hb}{a}} - H \leq \lambda \leq \sqrt{\frac{Hb}{a}} - H \end{aligned}$$

670 Since we require  $\lambda \geq 0$ , we only need to consider whether  $\sqrt{\frac{Hb}{a}} - H \geq 0 \iff b \geq Ha$ . If

671  $b < Ha$ , the infimum is attained at  $\lambda = 0$ . Otherwise, the infimum is attained at  $\lambda^* = \sqrt{\frac{Hb}{a}} - H$ , at  
672 which point

$$f(\lambda^*) = 2\sqrt{Hba} - Ha.$$

673 Plugging in, we see that the expression is equivalent to  $(\sqrt{b} - \sqrt{Ha})_+^2$  in both cases.  $\square$

674 **Lemma 9.** For  $a, b \geq 0$ , we have

$$\sup_{\lambda \geq 0} -\lambda a - \frac{b}{\lambda} = -\sqrt{4ab}$$

675 *Proof.* Define  $f(\lambda) = -\lambda a - \frac{b}{\lambda}$ , then

$$f'(\lambda) = -a + \frac{b}{\lambda^2} \geq 0 \iff \frac{b}{a} \geq \lambda^2$$

676 and so in the domain  $\lambda \geq 0$ , the optimum is attained at  $\lambda^* = \sqrt{b/a}$  at which point  $f(\lambda^*) =$   
677  $-2\sqrt{ab}$ .  $\square$

678 We are now ready to analyze the auxiliary problem.

679 **Lemma 10.** In the same setting as in Lemma 6, assume that for every  $\delta > 0$

680 (A)  $C_\delta : \mathbb{R}^d \rightarrow [0, \infty]$  is a continuous function such that with probability at least  $1 - \delta/4$  over  
681  $H \sim \mathcal{N}(0, I_d)$ , uniformly over all  $w \in \mathbb{R}^d$ , we have that

$$\langle \Sigma^{1/2} PH, w \rangle \leq C_\delta(w) \quad (63)$$

682 (B)  $\epsilon_\delta$  is a positive real number such that with probability at least  $1 - \delta/4$  over  $\{(\tilde{x}_i, \tilde{y}_i)\}_{i=1}^n$   
683 drawn i.i.d. from  $\tilde{D}$ , it holds uniformly over all  $\theta \in \Theta$  that

$$\frac{1}{n} \sum_{i=1}^n f(\langle \phi(w(\theta)), \tilde{x}_i \rangle, \tilde{y}_i, \theta) \geq \frac{1}{1 + \epsilon_\delta} \mathbb{E}_{(\tilde{x}, \tilde{y}) \sim \tilde{D}} [f(\langle \phi(w(\theta)), \tilde{x} \rangle, \tilde{y}, \theta)]. \quad (64)$$

684 where the distribution  $\tilde{D}$  over  $(\tilde{x}, \tilde{y})$  is given by

$$\tilde{x} \sim \mathcal{N}(0, I_{k+1}), \quad \tilde{\xi} \sim \mathcal{D}_\xi, \quad \tilde{y} = g(\tilde{x}_1, \dots, \tilde{x}_k, \tilde{\xi})$$

685 and the mapping  $\phi : \mathbb{R}^d \rightarrow \mathbb{R}^{k+1}$  is defined as

$$\phi(w) = (\langle w, \Sigma w_1^* \rangle, \dots, \langle w, \Sigma w_k^* \rangle, \|P\Sigma^{1/2} w\|_2)^T.$$

686 Then the following is true:

687 (i) suppose for some choice of  $M_\theta$  that is continuous in  $\theta$ , it holds for every  $y \in \mathcal{Y}$  and  $\theta \in \Theta$ ,  
 688  $f$  is  $M_\theta$ -Lipschitz with respect to the first argument, then with probability at least  $1 - \delta$ ,  
 689 uniformly over all  $\theta \in \Theta$ , we have

$$L(\theta) \leq (1 + \epsilon_\delta) \left( \hat{L}(\theta) + M_\theta \sqrt{\frac{C_\delta(w(\theta))^2}{n}} \right). \quad (65)$$

690 (ii) suppose for some choice of  $H_\theta$  that is continuous in  $\theta$ , it holds for every  $y \in \mathcal{Y}$  and  $\theta \in \Theta$ ,  
 691  $f$  is non-negative and  $\sqrt{f}$  is  $\sqrt{H_\theta}$ -Lipschitz with respect to the first argument, then with  
 692 probability at least  $1 - \delta$ , uniformly over all  $\theta \in \Theta$ , we have

$$L(\theta) \leq (1 + \epsilon_\delta) \left( \sqrt{\hat{L}(\theta)} + \sqrt{\frac{H_\theta C_\delta(w(\theta))^2}{n}} \right)^2. \quad (66)$$

693 *Proof.* First, let's simplify the auxiliary problem (59). Changing variables to subtract the quantity  
 694  $G_i \|P\Sigma^{1/2}w(\theta)\|_2 + \sum_{l=1}^k \langle w(\theta), \Sigma w_l^* \rangle \eta_{l,i}$  from each of the former  $u_i$ , we have that

$$\Psi = \sup_{\substack{(u, \theta) \in \mathbb{R}^n \times \Theta \\ \|u\|_2 \leq \langle H, P\Sigma^{1/2}w(\theta) \rangle}} F(\theta) - \frac{1}{n} \sum_{i=1}^n f \left( u_i + G_i \left\| P\Sigma^{1/2}w(\theta) \right\|_2 + \sum_{l=1}^k \langle w(\theta), \Sigma w_l^* \rangle \eta_{l,i}, y_i, \theta \right)$$

695 and separating the optimization problem in  $u$  and  $\theta$ , we obtain

$$\begin{aligned} \Psi &= \sup_{\theta \in \Theta} F(\theta) \\ &\quad - \frac{1}{n} \inf_{\substack{u \in \mathbb{R}^n: \\ \|u\|_2 \leq \langle H, P\Sigma^{1/2}w(\theta) \rangle}} \sum_{i=1}^n f \left( u_i + G_i \left\| P\Sigma^{1/2}w(\theta) \right\|_2 + \sum_{l=1}^k \langle w(\theta), \Sigma w_l^* \rangle \eta_{l,i}, y_i, \theta \right). \end{aligned}$$

696 Next, we will lower bound the infimum term by weak duality to obtain upper bound on  $\Psi$ :

$$\begin{aligned} &\inf_{\substack{u \in \mathbb{R}^n: \\ \|u\|_2 \leq \langle H, P\Sigma^{1/2}w(\theta) \rangle}} \sum_{i=1}^n f \left( u_i + G_i \left\| P\Sigma^{1/2}w(\theta) \right\|_2 + \sum_{l=1}^k \langle w(\theta), \Sigma w_l^* \rangle \eta_{l,i}, y_i, \theta \right) \\ &= \inf_{u \in \mathbb{R}^n} \sup_{\lambda \geq 0} \lambda (\|u\|_2^2 - \langle \Sigma^{1/2}PH, w(\theta) \rangle^2) \\ &\quad + \sum_{i=1}^n f \left( u_i + G_i \left\| P\Sigma^{1/2}w(\theta) \right\|_2 + \sum_{l=1}^k \langle w(\theta), \Sigma w_l^* \rangle \eta_{l,i}, y_i, \theta \right) \\ &\geq \sup_{\lambda \geq 0} -\lambda \langle \Sigma^{1/2}PH, w(\theta) \rangle^2 \\ &\quad + \inf_{u \in \mathbb{R}^n} \sum_{i=1}^n f \left( u_i + G_i \left\| P\Sigma^{1/2}w(\theta) \right\|_2 + \sum_{l=1}^k \langle w(\theta), \Sigma w_l^* \rangle \eta_{l,i}, y_i, \theta \right) + \lambda \|u\|_2^2 \\ &= \sup_{\lambda \geq 0} -\lambda \langle \Sigma^{1/2}PH, w(\theta) \rangle^2 \\ &\quad + \sum_{i=1}^n \inf_{u_i \in \mathbb{R}} f \left( u_i + G_i \left\| P\Sigma^{1/2}w(\theta) \right\|_2 + \sum_{l=1}^k \langle w(\theta), \Sigma w_l^* \rangle \eta_{l,i}, y_i, \theta \right) + \lambda u_i^2 \\ &= \sup_{\lambda \geq 0} -\lambda \langle \Sigma^{1/2}PH, w(\theta) \rangle^2 + \sum_{i=1}^n f_\lambda \left( G_i \left\| P\Sigma^{1/2}w(\theta) \right\|_2 + \sum_{l=1}^k \langle w(\theta), \Sigma w_l^* \rangle \eta_{l,i}, y_i, \theta \right). \end{aligned}$$

697 Suppose that for every  $y \in \mathcal{Y}$  and  $\theta \in \Theta$ ,  $f$  is  $M_\theta$ -Lipschitz with respect to the first argument, then  
 698 by Proposition 2, the above can be further lower bounded by the following quantity:

$$\sup_{\lambda \geq 0} -\lambda \langle \Sigma^{1/2}PH, w(\theta) \rangle^2 - \frac{nM_\theta^2}{4\lambda} + \sum_{i=1}^n f \left( \sum_{l=1}^k \langle w(\theta), \Sigma w_l^* \rangle \eta_{l,i} + \left\| P\Sigma^{1/2}w(\theta) \right\|_2 G_i, y_i, \theta \right).$$

699 On the other hand, suppose that for every  $y \in \mathcal{Y}$  and  $\theta \in \Theta$ ,  $f$  is non-negative and  $\sqrt{f}$  is  $\sqrt{H_\theta}$ -  
700 Lipschitz with respect to the first argument, then by Proposition 1, the above can be further lower  
701 bounded by:

$$\sup_{\lambda \geq 0} -\lambda \langle \Sigma^{1/2} P H, w(\theta) \rangle^2 + \frac{\lambda}{H_\theta + \lambda} \left[ \sum_{i=1}^n f \left( \sum_{l=1}^k \langle w(\theta), \Sigma w_l^* \rangle \eta_{l,i} + \left\| P \Sigma^{1/2} w(\theta) \right\|_2 G_i, y_i, \theta \right) \right].$$

702 Notice that if we write  $\tilde{x}_i = (\eta_{1,i}, \dots, \eta_{k,i}, G_i)$ , then  $(\tilde{x}_i, y_i)$  are independent with distribution exactly  
703 equal to  $\tilde{\mathcal{D}}$ . Moreover, we have

$$f \left( \sum_{l=1}^k \langle w(\theta), \Sigma w_l^* \rangle \eta_{l,i} + \left\| P \Sigma^{1/2} w(\theta) \right\|_2 G_i, y_i, \theta \right) = f(\langle \phi(w(\theta)), \tilde{x}_i \rangle, y_i, \theta)$$

704 and it is easy to see that the joint distribution of  $(\langle \phi(w(\theta)), \tilde{x} \rangle, y)$  with  $(\tilde{x}, y) \sim \tilde{\mathcal{D}}$  is exactly the  
705 same as  $(\langle w(\theta), x \rangle, y)$  with  $(x, y) \sim \mathcal{D}$ . As a result, we have that

$$\mathbb{E}_{(\tilde{x}, y) \sim \tilde{\mathcal{D}}} [f(\langle \phi(w(\theta)), \tilde{x} \rangle, y, \theta)] = L(\theta).$$

706 By our assumption (63), (64) and a union bound, we have with probability at least  $1 - \delta/2$

$$\begin{aligned} |\langle \Sigma^{1/2} P H, w(\theta) \rangle| &\leq C_\delta(w(\theta)) \\ \frac{1}{n} \sum_{i=1}^n f \left( \sum_{l=1}^k \langle w(\theta), \Sigma w_l^* \rangle \eta_{l,i} + \left\| P \Sigma^{1/2} w(\theta) \right\|_2 G_i, y_i, \theta \right) &\geq \frac{1}{1 + \epsilon_\delta} L(\theta). \end{aligned}$$

707 Therefore, if  $f$  is  $M_\theta$ -Lipschitz, then by Lemma 9, we have

$$\begin{aligned} \Psi &\leq \sup_{\theta \in \Theta} F(\theta) - \sup_{\lambda \geq 0} -\lambda \frac{C_\delta(w(\theta))^2}{n} - \frac{M_\theta^2}{4\lambda} + \frac{1}{1 + \epsilon_\delta} L(\theta) \\ &= \sup_{\theta \in \Theta} F(\theta) + \sqrt{M_\theta^2 \frac{C_\delta(w(\theta))^2}{n}} - \frac{1}{1 + \epsilon_\delta} L(\theta) \end{aligned}$$

708 Consequently, by taking  $F(\theta) = \frac{1}{1 + \epsilon_\delta} L(\theta) - M_\theta \sqrt{\frac{C_\delta(w(\theta))^2}{n}}$  and Lemma 7, we have shown that  
709 with probability at least  $1 - \delta$ , we have

$$\sup_{\theta \in \mathcal{K}} F(\theta) - \hat{L}(\theta) \leq 0 \implies \frac{1}{1 + \epsilon_\delta} L(\theta) \leq \hat{L}(\theta) + M_\theta \sqrt{\frac{C_\delta(w(\theta))^2}{n}}.$$

710 If  $\sqrt{f}$  is  $\sqrt{H_\theta}$ -Lipschitz, then by Lemma 8

$$\begin{aligned} \Psi &\leq \sup_{\theta \in \mathcal{K}} F(\theta) - \sup_{\lambda \geq 0} -\lambda \frac{C_\delta(w(\theta))^2}{n} + \frac{\lambda}{H_\theta + \lambda} \frac{1}{1 + \epsilon_\delta} L(\theta) \\ &= \sup_{\theta \in \mathcal{K}} F(\theta) - \left( \sqrt{\frac{L(\theta)}{1 + \epsilon_\delta}} - \sqrt{\frac{H_\theta C_\delta(w(\theta))^2}{n}} \right)^2_+. \end{aligned}$$

711 Consequently, by taking  $F(\theta) = \left( \sqrt{\frac{L(\theta)}{1 + \epsilon_\delta}} - \sqrt{\frac{H_\theta C_\delta(w(\theta))^2}{n}} \right)^2_+$  and Lemma 7, we have shown that  
712 with probability at least  $1 - \delta$ , we have

$$\sup_{\theta \in \mathcal{K}} F(\theta) - \hat{L}(\theta) \leq 0.$$

713 Rearranging, either we have

$$\sqrt{\frac{L(\theta)}{1 + \epsilon_\delta}} - \sqrt{\frac{H_\theta C_\delta(w(\theta))^2}{n}} < 0 \implies L(\theta) < (1 + \epsilon_\delta) \frac{H_\theta C_\delta(w(\theta))^2}{n}$$

714 or we have

$$\begin{aligned} \sqrt{\frac{L(\theta)}{1+\epsilon_\delta}} - \sqrt{\frac{H_\theta C_\delta(w(\theta))^2}{n}} \geq 0 &\implies \left( \sqrt{\frac{L(\theta)}{1+\epsilon_\delta}} - \sqrt{\frac{H_\theta C_\delta(w(\theta))^2}{n}} \right)^2 \leq \hat{L}(\theta) \\ &\implies L(\theta) \leq (1+\epsilon_\delta) \left( \sqrt{\hat{L}(\theta)} + \sqrt{\frac{H_\theta C_\delta(w(\theta))^2}{n}} \right)^2. \end{aligned}$$

715 In either case, the desired bound holds.  $\square$

716 Finally, we are ready to prove Theorem 6. In the version below, we also provide uniform convergence  
717 guarantee (with sharp constant) for Lipschitz loss.

718 **Theorem 14.** Suppose that assumptions (A), (B), (E) and (F) hold. For any  $\delta \in (0, 1)$ , let  $C_\delta : \mathbb{R}^d \rightarrow [0, \infty]$  be a continuous function such that with probability at least  $1 - \delta/4$  over  $x \sim \mathcal{N}(0, \Sigma)$ ,  
719 uniformly over all  $\theta \in \Theta$ ,

$$\langle w(\theta), Q^T x \rangle \leq C_\delta(w(\theta)). \quad (67)$$

721 Then it holds that

722 (i) if for each  $\theta \in \Theta$  and  $y \in \mathcal{Y}$ ,  $f$  is  $M_\theta$ -Lipschitz with respect to the first argument and  $M_\theta$  is  
723 continuous in  $\theta$ , then with probability at least  $1 - \delta$ , it holds that uniformly over all  $\theta \in \Theta$ ,  
724 we have

$$(1 - \epsilon) L(\theta) \leq \hat{L}(\theta) + M_\theta \sqrt{\frac{C_\delta(w(\theta))^2}{n}} \quad (68)$$

725 (ii) if for each  $\theta \in \Theta$  and  $y \in \mathcal{Y}$ ,  $f$  is non-negative and  $\sqrt{f}$  is  $\sqrt{H_\theta}$ -Lipschitz with respect to  
726 the first argument, and  $H_\theta$  is continuous in  $\theta$ , then with probability at least  $1 - \delta$ , it holds  
727 that uniformly over all  $\theta \in \Theta$ , we have

$$(1 - \epsilon) L(\theta) \leq \left( \sqrt{\hat{L}(\theta)} + \sqrt{\frac{H_\theta C_\delta(w(\theta))^2}{n}} \right)^2 \quad (69)$$

728 where  $\epsilon = O\left(\tau \sqrt{\frac{h \log(n/h) + \log(1/\delta)}{n}}\right)$ .

729 *Proof.* We apply the reduction argument at the beginning of the appendix. Given  $\mathcal{D}$  that satisfies  
730 assumptions (A) and (B), we define  $[\tilde{w}_1^*, \dots, \tilde{w}_k^*] = \tilde{W} = W(W^T \Sigma W)^{-1/2}$  and  $\tilde{f}, \tilde{g}$  as in (54) and  
731 (55). For  $\{(x_i, y_i)\}_{i=1}^n$  sampled independently from  $\mathcal{D}$ , we observe that the joint distribution of  
732  $(x_i - \mu, y_i)$  can also be described by  $\mathcal{D}'$  as follows:

733 (A')  $x \sim \mathcal{N}(0, \Sigma)$

734 (B')  $y = \tilde{g}(\eta_1, \dots, \eta_k, \xi)$  where  $\eta_i = \langle x, \tilde{w}_i \rangle$ .

735 Indeed, we can check that

$$\begin{aligned} y &= g(x^T W, \xi) \\ &= g((x - \mu)^T \tilde{W} (W^T \Sigma W)^{1/2} + \mu^T W, \xi) \\ &= \tilde{g}((x - \mu)^T \tilde{W}, \xi). \end{aligned}$$

736 Moreover, by construction, we have

$$\begin{aligned} \hat{L}(\theta) &= \frac{1}{n} \sum_{i=1}^n \tilde{f}(\langle w(\theta), x_i - \mu \rangle, y_i, \theta) \\ L(\theta) &= \mathbb{E}_{\mathcal{D}'} \tilde{f}(\langle w(\theta), x_i \rangle, y_i, \theta) \end{aligned}$$

737 and  $\mathcal{D}'$  satisfies assumptions (A) and (B) with  $\mu = 0$  and orthonormal  $\Sigma^{1/2} \tilde{w}_1^*, \dots, \Sigma^{1/2} \tilde{w}_k^*$  and falls  
738 into the setting in Lemma 6. We see that  $f$  being Lipschitz or square-root Lipschitz is equivalent to

739  $\tilde{f}$  being Lipschitz or square-root Lipschitz. It remains to check assumptions (63) and (64) and then  
 740 apply Lemma 10. Observe that

$$\begin{aligned}\Sigma^{-1/2}P\Sigma^{1/2} &= \Sigma^{-1/2}\left(I_d - \Sigma^{1/2}\tilde{W}\tilde{W}^T\Sigma^{1/2}\right)\Sigma^{1/2} \\ &= I_d - \tilde{W}\tilde{W}^T\Sigma = I - W(W^T\Sigma W)^{-1}W^T\Sigma \\ &= Q\end{aligned}\tag{70}$$

741 and so  $\Sigma^{1/2}P = Q^T\Sigma^{1/2}$ .

742 To check that (63) holds, observe that  $\langle \Sigma^{1/2}PH, w \rangle$  has the same distribution as  $\langle Qw, x \rangle$ . To check  
 743 that (64) holds, we will apply Theorem 13. Note that the joint distribution of  $(\langle \phi(w(\theta)), \tilde{x} \rangle, \tilde{y})$  with  
 744  $(\tilde{x}, \tilde{y}) \sim \tilde{\mathcal{D}}$  is exactly the same as  $(\langle w(\theta), x \rangle, y)$  with  $(x, y) \sim \mathcal{D}'$  and so

$$\frac{\mathbb{E}_{\tilde{\mathcal{D}}}[\tilde{f}(\langle \phi(w(\theta)), x \rangle, y, \theta)^4]^{1/4}}{\mathbb{E}_{\tilde{\mathcal{D}}}[\tilde{f}(\langle \phi(w(\theta)), x \rangle, y, \theta)]} = \frac{\mathbb{E}_{\mathcal{D}'}[\tilde{f}(\langle w(\theta), x \rangle, y, \theta)^4]^{1/4}}{\mathbb{E}_{\mathcal{D}'}[\tilde{f}(\langle w(\theta), x \rangle, y, \theta)]} = \frac{\mathbb{E}_{\mathcal{D}}[f(\langle w(\theta), x \rangle, y, \theta)^4]^{1/4}}{\mathbb{E}_{\mathcal{D}}[f(\langle w(\theta), x \rangle, y, \theta)]}.$$

745 Therefore, the assumption (E) is equivalent to the hypercontractivity condition in Theorem 13.  
 746 Note that  $\{(x, y) \mapsto \mathbb{1}\{\tilde{f}(\langle \phi(w(\theta)), x \rangle, y, \theta) > t\} : (\theta, t) \in \Theta \times \mathbb{R}\}$  is a subclass of  $\{(x, y) \mapsto$   
 747  $\mathbb{1}\{f(\langle w, x \rangle + b, y, \theta) > t\} : (w, b, t, \theta) \in \mathbb{R}^{k+1} \times \mathbb{R} \times \mathbb{R} \times \Theta\}$ . Therefore, by assumption (F), we  
 748 can apply Theorem 13 and (64) holds.  $\square$

## 749 D Norm Bounds

750 The following lemma is a version of Lemma 7 of Koehler et al. (2021) and follows straightforwardly  
 751 from CGMT (Theorem 7), though it requires a slightly different truncation argument compared  
 752 to the proof Theorem 6. For simplicity, we won't repeat the proof here and simply use it for our  
 753 applications.

754 **Lemma 11** (Koehler et al. 2021, Lemma 7). *Let  $Z : n \times d$  be a matrix with i.i.d.  $\mathcal{N}(0, 1)$  entries and*  
 755 *suppose  $G \sim \mathcal{N}(0, I_n)$  and  $H \sim \mathcal{N}(0, I_d)$  are independent of  $Z$  and each other. Fix an arbitrary*  
 756 *norm  $\|\cdot\|$ , any covariance matrix  $\Sigma$ , and any non-random vector  $\xi \in \mathbb{R}^n$ , consider the Primary*  
 757 *Optimization (PO) problem:*

$$\Phi := \min_{\substack{w \in \mathbb{R}^d: \\ Z\Sigma^{1/2}w = \xi}} \|w\| \tag{71}$$

758 and the Auxiliary Optimization (AO) problem:

$$\Psi := \min_{\substack{w \in \mathbb{R}^d: \\ \|G\|\Sigma^{1/2}w\|_2 - \xi\|_2 \leq \langle \Sigma^{1/2}H, w \rangle}} \|w\|. \tag{72}$$

759 Then for any  $t \in \mathbb{R}$ , it holds that

$$\Pr(\Phi > t) \leq 2\Pr(\Psi \geq t). \tag{73}$$

760 The next lemma analyzes the AO in Lemma 11. Our proof closely follows Lemma 8 of Koehler et al.  
 761 2021, but we don't make assumptions on  $\xi$  yet to allow more applications.

762 **Lemma 12.** *Let  $Z : n \times d$  be a matrix with i.i.d.  $\mathcal{N}(0, 1)$  entries. Fix any  $\delta > 0$ , covariance matrix*  
 763  *$\Sigma$  and non-random vector  $\xi \in \mathbb{R}^n$ , then there exists  $\epsilon \lesssim \log(1/\delta) \left( \frac{1}{n} + \frac{1}{\sqrt{R(\Sigma)}} + \frac{n}{R(\Sigma)} \right)$  such that*  
 764 *with probability at least  $1 - \delta$ , it holds that*

$$\min_{\substack{w \in \mathbb{R}^d: \\ Z\Sigma^{1/2}w = \xi}} \|w\|_2^2 \leq (1 + \epsilon) \frac{\|\xi\|_2^2}{\text{Tr}(\Sigma)}. \tag{74}$$

765 *Proof.* By a union bound, there exists a constant  $C > 0$  such that the following events occur together  
 766 with probability at least  $1 - \delta/2$ :

767 1. Since  $\langle G, \xi \rangle \sim \mathcal{N}(0, \|\xi\|_2^2)$ , by the standard Gaussian tail bound  $\Pr(|Z| \geq t) \leq 2e^{-t^2/2}$ ,  
 768 we have

$$|\langle G, \xi \rangle| \leq \|\xi\|_2 \sqrt{2 \log(32/\delta)}$$

769 2. Using subexponential Bernstein's inequality (Theorem 2.8.1 of Vershynin (2018)), requiring  
 770  $n = \Omega(\log(1/\delta))$ , we have

$$\|G\|_2^2 \leq 2n$$

771 3. Using the first part of Lemma 4, we have

$$\|\Sigma^{1/2} H\|_2^2 \geq \text{Tr}(\Sigma) \left( 1 - C \frac{\log(32/\delta)}{\sqrt{R(\Sigma)}} \right)$$

772 4. Using the last part of Lemma 4, requiring  $R(\Sigma) \gtrsim \log(32/\delta)^2$

$$\frac{\|\Sigma H\|_2^2}{\|\Sigma^{1/2} H\|_2^2} \leq C \log(32/\delta) \frac{\text{Tr}(\Sigma^2)}{\text{Tr}(\Sigma)}$$

773 Therefore, by the AM-GM inequality, it holds that

$$\begin{aligned} \|G\|\Sigma^{1/2}w\|_2 - \|\xi\|_2^2 &= \|G\|_2^2 \|\Sigma^{1/2}w\|_2^2 + \|\xi\|_2^2 - 2\langle G, \xi \rangle \|\Sigma^{1/2}w\|_2 \\ &\leq 2n \|\Sigma^{1/2}w\|_2^2 + \|\xi\|_2^2 + 2\|\xi\|_2 \sqrt{2 \log(32/\delta)} \|\Sigma^{1/2}w\|_2 \\ &\leq 3n \|\Sigma^{1/2}w\|_2^2 + \left( 1 + \frac{2 \log(32/\delta)}{n} \right) \|\xi\|_2^2. \end{aligned}$$

774 To apply lemma 11, we will consider  $w$  of the form  $w = \alpha \frac{\Sigma^{1/2} H}{\|\Sigma^{1/2} H\|_2}$  for some  $\alpha > 0$ . Then we have

$$\|G\|\Sigma^{1/2}w\|_2 - \|\xi\|_2^2 \leq 3nC \log(32/\delta) \frac{\text{Tr}(\Sigma^2)}{\text{Tr}(\Sigma)} \alpha^2 + \left( 1 + \frac{2 \log(32/\delta)}{n} \right) \|\xi\|_2^2$$

775 and

$$\langle \Sigma^{1/2} H, w \rangle^2 = \alpha^2 \|\Sigma^{1/2} H\|_2^2 \geq \alpha^2 \text{Tr}(\Sigma) \left( 1 - C \frac{\log(32/\delta)}{\sqrt{R(\Sigma)}} \right).$$

776 So it suffices to choose  $\alpha$  such that

$$\begin{aligned} \alpha^2 &\geq \frac{\left( 1 + \frac{2 \log(32/\delta)}{n} \right) \|\xi\|_2^2}{\text{Tr}(\Sigma) \left( 1 - C \frac{\log(32/\delta)}{\sqrt{R(\Sigma)}} \right) - 3nC \log(32/\delta) \frac{\text{Tr}(\Sigma^2)}{\text{Tr}(\Sigma)}} \\ &= \frac{1 + \frac{2 \log(32/\delta)}{n}}{1 - C \log(32/\delta) \left( \frac{1}{\sqrt{R(\Sigma)}} + 3 \frac{n}{R(\Sigma)} \right)} \frac{\|\xi\|_2^2}{\text{Tr}(\Sigma)} \end{aligned}$$

777 and we are done. □

778 A challenge for analyzing the minimal norm to interpolate is that the projection matrix  $Q$  is not  
 779 necessarily an orthogonal projection. However, the following lemma suggests that if  $\Sigma^\perp = Q^T \Sigma Q$   
 780 has high effective rank, then we can let  $R$  be the orthogonal projection matrix onto the image of  $Q$   
 781 and  $R \Sigma R$  is approximately the same as  $\Sigma^\perp$  in terms of the quantities that are relevant to the norm  
 782 analysis.

783 **Lemma 13.** Consider  $Q = I - \sum_{i=1}^k w_i^* (w_i^*)^T \Sigma$  where  $\Sigma^{1/2} w_1^*, \dots, \Sigma^{1/2} w_k^*$  are orthonormal and  
 784 we let  $R$  be the orthogonal projection matrix onto the image of  $Q$ . Then it holds that  $\text{rank}(R) = d - k$   
 785 and

$$R \Sigma w_i^* = 0 \quad \text{for any } i = 1, \dots, k.$$

786 Moreover, we have  $QR = R$  and  $RQ = Q$ , and so

$$\begin{aligned} \frac{1}{\text{Tr}(R \Sigma R)} &\leq \left( 1 - \frac{k}{n} - \frac{n}{R(Q^T \Sigma Q)} \right)^{-1} \frac{1}{\text{Tr}(Q^T \Sigma Q)} \\ \frac{n}{R(R \Sigma R)} &\leq \left( 1 - \frac{k}{n} - \frac{n}{R(Q^T \Sigma Q)} \right)^{-2} \frac{n}{R(Q^T \Sigma Q)}. \end{aligned}$$

787 *Proof.* It is obvious that  $\text{rank}(R) = \text{rank}(Q)$  and by the rank-nullity theorem, it suffices to show the  
 788 nullity of  $Q$  is  $k$ . To this end, we observe that

$$\begin{aligned} Qw = 0 &\iff \Sigma^{-1/2} \left( I - \sum_{i=1}^k (\Sigma^{1/2} w_i^*) (\Sigma^{1/2} w_i^*)^T \right) \Sigma^{1/2} w = 0 \\ &\iff \left( I - \sum_{i=1}^k (\Sigma^{1/2} w_i^*) (\Sigma^{1/2} w_i^*)^T \right) \Sigma^{1/2} w = 0 \\ &\iff \Sigma^{1/2} w \in \text{span}\{\Sigma^{1/2} w_1^*, \dots, \Sigma^{1/2} w_k^*\} \\ &\iff w \in \text{span}\{w_1^*, \dots, w_k^*\}. \end{aligned}$$

789 It is also straightforward to verify that  $Q^2 = Q$  and  $Q^T \Sigma w_i^* = 0$  for  $i = 1, \dots, k$ . For any  $v \in \mathbb{R}^d$ ,  
 790  $Rv$  lies in the image of  $Q$  and so there exists  $w$  such that  $Rv = Qw$ . Then we can check that

$$\begin{aligned} v^T R \Sigma w_i^* &= \langle Rv, \Sigma w_i^* \rangle \\ &= \langle Qw, \Sigma w_i^* \rangle = \langle w, Q^T \Sigma w_i^* \rangle = 0 \end{aligned}$$

791 and

$$\begin{aligned} (QR)v &= Q(Rv) \\ &= Q(Qw) = Q^2 w \\ &= Qw = Rv. \end{aligned}$$

792 Since the choice of  $v$  is arbitrary, it must be the case that  $R \Sigma w_i^* = 0$  and  $QR = R$ . For any  $v \in \mathbb{R}^d$ ,  
 793 we can check

$$(RQ)v = R(Qv) = Qv$$

794 by the definition of orthogonal projection. Therefore, it must be the case that  $RQ = Q$ . Finally, we  
 795 use  $R = QR = RQ^T$  to show that

$$\begin{aligned} \text{Tr}(R \Sigma R) &= \text{Tr}(R Q^T \Sigma Q R) = \text{Tr}(Q^T \Sigma Q R) \\ &= \text{Tr}(Q^T \Sigma Q) - \text{Tr}(Q^T \Sigma Q (I - R)) \\ &\geq \text{Tr}(Q^T \Sigma Q) - \sqrt{\text{Tr}((Q^T \Sigma Q)^2) \text{Tr}((I - R)^2)} \\ &= \text{Tr}(Q^T \Sigma Q) \left( 1 - \sqrt{\frac{k}{R(Q^T \Sigma Q)}} \right) \\ &= \text{Tr}(Q^T \Sigma Q) \left( 1 - \frac{k}{n} - \frac{n}{R(Q^T \Sigma Q)} \right) \end{aligned}$$

796 and

$$\begin{aligned} \text{Tr}((R \Sigma R)^2) &= \text{Tr}(\Sigma R \Sigma R) \\ &= \text{Tr}(\Sigma Q R Q^T \Sigma Q R Q^T) \\ &= \text{Tr}((R Q^T \Sigma Q) R (Q^T \Sigma Q R)) \\ &\leq \text{Tr}((R Q^T \Sigma Q) (Q^T \Sigma Q R)) = \text{Tr}((Q^T \Sigma Q)^2 R) \\ &\leq \text{Tr}((Q^T \Sigma Q)^2). \end{aligned}$$

797 Rearranging concludes the proof. □

## 798 D.1 Phase Retrieval

799 **Theorem 2.** Under assumptions (A) and (B), let  $f : \mathbb{R} \times \mathcal{Y} \rightarrow \mathbb{R}$  be given by  $f(\hat{y}, y) := (|\hat{y}| - y)^2$   
 800 with  $\mathcal{Y} = \mathbb{R}_{\geq 0}$ . Let  $Q$  be the same as in Theorem 1 and  $\Sigma^\perp = Q^T \Sigma Q$ . Fix any  $w^\sharp \in \mathbb{R}^d$  such that  
 801  $Qw^\sharp = 0$  and for some  $\rho \in (0, 1)$ , it holds that

$$\hat{L}_f(w^\sharp) \leq (1 + \rho) L_f(w^\sharp). \quad (9)$$

802 Then with probability at least  $1 - \delta$ , for some  $\epsilon \lesssim \rho + \log\left(\frac{1}{\delta}\right) \left( \frac{1}{\sqrt{n}} + \frac{1}{\sqrt{R(\Sigma^\perp)}} + \frac{k}{n} + \frac{n}{R(\Sigma^\perp)} \right)$ , it  
 803 holds that

$$\min_{\substack{w \in \mathbb{R}^d: \\ \forall i \in [n], \langle w, x_i \rangle^2 = y_i^2}} \|w\|_2 \leq \|w^\sharp\|_2 + (1 + \epsilon) \sqrt{\frac{nL_f(w^\sharp)}{\text{Tr}(\Sigma^\perp)}}. \quad (10)$$

804 *Proof.* Without loss of generality, we assume that  $\mu$  lies in the span of  $\{\Sigma w_1^*, \dots, \Sigma w_k^*\}$  because  
 805 otherwise we can simply increase  $k$  by one. Moreover, we can assume that  $\{\Sigma^{1/2} w_1^*, \dots, \Sigma^{1/2} w_k^*\}$   
 806 are orthonormal because otherwise we let  $\tilde{W} = W(W^T \Sigma W)^{-1}$  and conditioning on  $W^T(x - \mu)$  is  
 807 the same as conditioning on  $\tilde{W}^T(x - \mu)$ . By Lemma 5, conditioned on

$$\begin{pmatrix} \eta_1^T \\ \dots \\ \eta_k^T \end{pmatrix} = [W^T(x_1 - \mu), \dots, W^T(x_n - \mu)]$$

808 the distribution of  $X$  is the same as

$$X = 1\mu^T + \sum_{i=1}^k \eta_i (\Sigma w_i^*)^T + Z \Sigma^{1/2} Q$$

809 where  $Z$  has i.i.d. standard normal entries. Furthermore, conditioned on  $W^T(x - \mu)$  and the noise  
 810 of variable in  $y$  (which is independent of  $x$ ), by the multi-index assumption (B), the label  $y$  is  
 811 non-random. Since  $Qw^\sharp = 0$ , we have  $w^\sharp = \sum_{i=1}^k \langle w_i^*, \Sigma w^\sharp \rangle w_i^*$  and so

$$\langle w^\sharp, x \rangle = \langle w^\sharp, \mu \rangle + \sum_{i=1}^k \langle w_i^*, \Sigma w^\sharp \rangle \langle w_i^*, x - \mu \rangle.$$

812 Therefore,  $\langle w^\sharp, x \rangle$  also becomes non-random after conditioning. We can let  $I = \{i \in [n] : \langle w^\sharp, x_i \rangle \geq$   
 813  $0\}$  and define  $\xi \in \mathbb{R}^n$  by

$$\xi_i = \begin{cases} y_i - |\langle w^\sharp, x_i \rangle| & \text{if } i \in I \\ |\langle w^\sharp, x_i \rangle| - y_i & \text{if } i \notin I \end{cases}$$

814 and  $\xi$  is non-random after conditioning. Following the construction discussed in the main text, for  
 815 any  $w^\sharp \in \mathbb{R}^d$ , the predictor  $w = w^\sharp + w^\perp$  satisfies  $|\langle w, x_i \rangle| = y_i$  where

$$w^\perp = \arg \min_{\substack{w \in \mathbb{R}^d: \\ Xw = \xi}} \|w\|_2$$

816 by the definition of  $\xi$ . Hence, we have

$$\min_{w \in \mathbb{R}^d: \forall i \in [n], \langle w, x_i \rangle^2 = y_i^2} \|w\|_2 \leq \|w^\sharp\|_2 + \|w^\perp\|_2$$

817 and it suffices to control  $\|w^\perp\|_2$ .

818 Let  $R$  be the orthogonal projection matrix onto the image of  $Q$  and we consider  $w$  of the form  $Rw$  to  
 819 upper bound  $\|w^\perp\|_2$ . By Lemma 13, we know  $QR = R$  and  $R\Sigma w_i^* = 0$ . By the assumption that  $\mu$   
 820 lies in the span of  $\{\Sigma w_1^*, \dots, \Sigma w_k^*\}$ , we have

$$\left( 1\mu^T + \sum_{i=1}^k \eta_i (\Sigma w_i^*)^T + Z \Sigma^{1/2} Q \right) Rw = Z \Sigma^{1/2} Rw.$$

821 Since  $R$  is an orthogonal projection, it holds that  $\|Rw\|_2 \leq \|w\|_2$ . Finally, we observe that the  
 822 distribution of  $Z \Sigma^{1/2} R$  is the same as  $Z(R\Sigma R)^{1/2}$  and so

$$\|w^\perp\|_2 \leq \min_{\substack{w \in \mathbb{R}^d: \\ Z(R\Sigma R)^{1/2} w = \xi}} \|w\|_2.$$

823 We are now ready to apply Lemma 12 to the covariance  $R\Sigma R$ . We are allowed to replace the  
 824 dependence on  $R\Sigma R$  by the dependence on  $\Sigma^\perp$  by the last two inequalities of Lemma 13. The desired  
 825 conclusion follows by the observation that  $\|\xi\|_2^2 = n\hat{L}_f(w^\sharp)$  and the assumption that  $\hat{L}_f(w^\sharp) \leq$   
 826  $(1 + \rho)L_f(w^\sharp)$ .  $\square$

## 827 D.2 ReLU Regression

828 The proof of Theorem 3 will closely follow the proof of Theorem 2.

829 **Theorem 3.** Under assumptions (A) and (B), let  $f : \mathbb{R} \times \mathcal{Y} \rightarrow \mathbb{R}$  be the loss defined in (13) with  
 830  $\mathcal{Y} = \mathbb{R}_{\geq 0}$ . Let  $Q$  be the same as in Theorem 1 and  $\Sigma^\perp = Q^T \Sigma Q$ . Fix any  $(w^\sharp, b^\sharp) \in \mathbb{R}^{d+1}$  such that  
 831  $Qw^\sharp = 0$  and for some  $\rho \in (0, 1)$ , it holds that

$$\hat{L}_f(w^\sharp, b^\sharp) \leq (1 + \rho)L_f(w^\sharp, b^\sharp). \quad (14)$$

832 Then with probability at least  $1 - \delta$ , for some  $\epsilon \lesssim \rho + \log(\frac{1}{\delta}) \left( \frac{1}{\sqrt{n}} + \frac{1}{\sqrt{R(\Sigma^\perp)}} + \frac{k}{n} + \frac{n}{R(\Sigma^\perp)} \right)$ , it  
 833 holds that

$$\min_{\substack{(w,b) \in \mathbb{R}^{d+1}: \\ \forall i \in [n], \sigma(\langle w, x_i \rangle + b) = y_i}} \|w\|_2 \leq \|w^\sharp\|_2 + (1 + \epsilon) \sqrt{\frac{nL_f(w^\sharp, b^\sharp)}{\text{Tr}(\Sigma^\perp)}}. \quad (15)$$

834 *Proof.* We let  $I = \{i \in [n] : y_i > 0\}$  and for any  $(w^\sharp, b^\sharp) \in \mathbb{R}^{d+1}$ , we define  $\xi \in \mathbb{R}^n$  by

$$\xi_i = \begin{cases} y_i - \langle w^\sharp, x_i \rangle - b^\sharp & \text{if } i \in I \\ -\sigma(\langle w^\sharp, x_i \rangle + b^\sharp) & \text{if } i \notin I. \end{cases}$$

835 By the definition of  $\xi$ , the predictor  $(w, b) = (w^\sharp + w^\perp, b^\sharp)$  satisfies  $\sigma(\langle w, x_i \rangle + b) = y_i$  where

$$w^\perp = \arg \min_{\substack{w \in \mathbb{R}^d: \\ Xw = \xi}} \|w\|_2.$$

836 Hence, we have

$$\min_{\substack{(w,b) \in \mathbb{R}^{d+1}: \\ \forall i \in [n], \sigma(\langle w, x_i \rangle + b) = y_i}} \|w\|_2 \leq \|w^\sharp\|_2 + \|w^\perp\|_2$$

837 and it suffices to control  $\|w^\perp\|_2$ .

838 Similar to the proof of Theorem 2, we make the simplifying assumption that  $\mu$  lies in the span  
 839 of  $\{\Sigma w_1^*, \dots, \Sigma w_k^*\}$  and  $\{\Sigma^{1/2} w_1^*, \dots, \Sigma^{1/2} w_k^*\}$  are orthonormal. Conditioned on  $W^T(x_i - \mu)$  and  
 840 the noise variable in  $y_i$ , both  $y_i$  and  $\langle w^\sharp, x_i \rangle$  are non-random, and so  $\xi$  is also non-random. The  
 841 distribution of  $X$  is the same as

$$X = 1\mu^T + \sum_{i=1}^k \eta_i (\Sigma w_i^*)^T + Z \Sigma^{1/2} Q.$$

842 If we consider  $w$  of the form  $Rw$ , then we have

$$\|w^\perp\|_2 \leq \min_{\substack{w \in \mathbb{R}^d: \\ Z(R\Sigma R)^{1/2}w = \xi}} \|w\|_2.$$

843 We are now ready to apply Lemma 12 to the covariance  $R\Sigma R$ . We are allowed to replace the  
 844 dependence on  $R\Sigma R$  by the dependence on  $\Sigma^\perp$  by the last two inequalities of Lemma 13. The  
 845 desired conclusion follows by the observation that  $\|\xi\|_2^2 = n\hat{L}_f(w^\sharp, b^\sharp)$  due to the definition (13) and  
 846 the assumption that  $\hat{L}_f(w^\sharp) \leq (1 + \rho)L_f(w^\sharp, b^\sharp)$ .  $\square$

## 847 D.3 Low-rank Matrix Sensing

848 **Theorem 4.** Suppose that  $d_1 d_2 > n$ , then there exists some  $\epsilon \lesssim \sqrt{\frac{\log(32/\delta)}{n}} + \frac{n}{d_1 d_2}$  such that with  
 849 probability at least  $1 - \delta$ , it holds that

$$\min_{\forall i \in [n], \langle A_i, X \rangle = y_i} \|X\|_* \leq \sqrt{r} \|X^*\|_F + (1 + \epsilon) \sqrt{\frac{n\sigma^2}{d_1 \vee d_2}}. \quad (17)$$

850 *Proof.* Without loss of generality, we will assume that  $d_1 \leq d_2$ . We will vectorize the measurement  
851 matrices and estimator  $A_1, \dots, A_n, X \in \mathbb{R}^{d_1 \times d_2}$  as  $a_1, \dots, a_n, x \in \mathbb{R}^{d_1 d_2}$  and define  $\|x\|_* = \|X\|_*$ .  
852 Denote  $A = [a_1, \dots, a_n]^T \in \mathbb{R}^{n \times d_1 d_2}$ . We define the primary problem  $\Phi$  by

$$\Phi := \min_{\forall i \in [n], \langle A_i, X \rangle = \xi} \|X\|_* = \min_{Ax = \xi} \|x\|_*.$$

853 By Lemma 11, it suffices to consider the auxiliary problem

$$\Psi := \min_{\|G\|x\|_2 - \xi\|_2 \leq -\langle H, x \rangle} \|x\|_*.$$

854 We will pick  $x$  of the form  $x = -\alpha H$  for some  $\alpha \geq 0$ , which needs to satisfy  $\alpha\|H\|_2^2 \geq \|\alpha G\|H\|_2 -$   
855  $\xi\|_2$ . By a union bound, the following events occur simultaneously with probability at least  $1 - \delta/2$ :

856 1. by Lemma 3, it holds that

$$\begin{aligned} \|G\|_2 &\leq \sqrt{n} + 2\sqrt{\log(32/\delta)} \\ \frac{\|\xi\|_2}{\sigma} &\leq \sqrt{n} + 2\sqrt{\log(32/\delta)} \\ \|H\|_2 &\leq \sqrt{d_1 d_2} + 2\sqrt{\log(32/\delta)} \end{aligned}$$

857 2. Condition on  $\xi$ , we have  $\frac{1}{\|\xi\|} \langle G, \xi \rangle \sim \mathcal{N}(0, 1)$  and so by standard Gaussian tail bound

858  $\Pr(|Z| > t) \leq 2e^{-t^2/2}$

$$\frac{|\langle G, \xi \rangle|}{\|\xi\|} \leq \sqrt{2 \log(16/\delta)}$$

859 Then we can use AM-GM inequality to show for sufficiently large  $n$

$$\begin{aligned} &\|\alpha G\|H\|_2 - \xi\|_2^2 \\ &= \alpha^2 \|G\|_2^2 \|H\|_2^2 + \|\xi\|^2 - 2\alpha \|H\|_2 \langle G, \xi \rangle \\ &\leq n\alpha^2 \|H\|_2^2 \left(1 + 2\sqrt{\frac{\log(32/\delta)}{n}}\right)^2 + \|\xi\|^2 + 2\sqrt{n}\alpha \|H\|_2 \|\xi\|_2 \sqrt{\frac{2 \log(16/\delta)}{n}} \\ &\leq n\alpha^2 \|H\|_2^2 \left(1 + 10\sqrt{\frac{\log(32/\delta)}{n}}\right) + \left(1 + \sqrt{\frac{2 \log(16/\delta)}{n}}\right) \|\xi\|_2^2 \end{aligned}$$

860 and it suffices to let

$$\alpha^2 \|H\|_2^4 \geq n\alpha^2 \|H\|_2^2 \left(1 + 10\sqrt{\frac{\log(32/\delta)}{n}}\right) + \left(1 + \sqrt{\frac{2 \log(16/\delta)}{n}}\right) \|\xi\|_2^2.$$

861 Rearranging the above inequality, we can choose

$$\alpha = \left( \frac{1 + 10\sqrt{\frac{\log(32/\delta)}{n}}}{1 - \frac{n}{d_1 d_2} \left(1 + 10\sqrt{\frac{\log(32/\delta)}{n}}\right) \left(1 + 2\sqrt{\frac{\log(32/\delta)}{d_1 d_2}}\right)^2} \right)^{1/2} \frac{\sqrt{n\sigma^2}}{\|H\|_2^2}$$

862 and since  $H$  as a matrix can have at most rank  $d_1$ , by Cauchy-Schwarz inequality on the singular  
863 values of  $H$ , we have  $\|H\|_* \leq \sqrt{d_1} \|H\|_2$  and

$$\|x\|_* = \alpha \|H\|_* \leq \alpha \sqrt{d_1} \|H\|_2 \leq (1 + \epsilon) \sqrt{\frac{d_1 (n\sigma^2)}{d_1 d_2}} = (1 + \epsilon) \sqrt{\frac{n\sigma^2}{d_2}}$$

864 for some  $\epsilon \lesssim \sqrt{\frac{\log(32/\delta)}{n}} + \frac{n}{d_1 d_2}$ . The desired conclusion follows by the observation that  $\|X^*\|_* \leq$   
865  $\sqrt{r} \|X^*\|_F$  because  $X^*$  has rank  $r$ .  $\square$

**Theorem 5.** Fix any  $\delta \in (0, 1)$ . There exist constants  $c_1, c_2, c_3 > 0$  such that if  $d_1 d_2 > c_1 n$ ,  $d_2 > c_2 d_1$ ,  $n > c_3 r(d_1 + d_2)$ , then with probability at least  $1 - \delta$  that

$$\frac{\|\hat{X} - X^*\|_F^2}{\|X^*\|_F^2} \lesssim \frac{r(d_1 + d_2)}{n} + \sqrt{\frac{r(d_1 + d_2)}{n}} \frac{\sigma}{\|X^*\|_F} + \left( \sqrt{\frac{d_1}{d_2}} + \frac{n}{d_1 d_2} \right) \frac{\sigma^2}{\|X^*\|_F^2}. \quad (18)$$

*Proof.* Note that  $\langle A, X^* \rangle \sim \mathcal{N}(0, \|X^*\|_F^2)$  and so by the standard Gaussian tail bound  $\Pr(|Z| \geq t) \leq 2e^{-t^2/2}$ , Theorem 9 and a union bound, it holds with probability at least  $1 - \delta/8$  that

$$\begin{aligned} |\langle A, X^* \rangle| &\leq \sqrt{2 \log(32/\delta)} \|X^*\|_F \\ \|A\|_{op} &\leq \sqrt{d_1} + \sqrt{d_2} + \sqrt{2 \log(32/\delta)}. \end{aligned}$$

Then it holds that

$$\begin{aligned} \left\| A - \frac{\langle A, X^* \rangle}{\|X^*\|_F^2} X^* \right\|_{op} &\leq \|A\|_{op} + \frac{|\langle A, X^* \rangle|}{\|X^*\|_F^2} \|X^*\|_{op} \\ &\leq \sqrt{d_1} + \sqrt{d_2} + \sqrt{2 \log(32/\delta)} + \frac{\|X^*\|_{op}}{\|X^*\|_F} \sqrt{2 \log(32/\delta)} \\ &\leq \sqrt{d_1} + \sqrt{d_2} + \sqrt{8 \log(32/\delta)}. \end{aligned}$$

Therefore, we can choose  $C_\delta$  in Theorem 1 by

$$C_\delta(X) := \left( \sqrt{d_1} + \sqrt{d_2} + \sqrt{8 \log(32/\delta)} \right) \|X\|_*$$

and applying Theorem 1 and Theorem 4, we have

$$\begin{aligned} (1 - \epsilon) L(\hat{X}) &\leq \frac{C_\delta(X)^2}{n} \\ &\leq \frac{\left( \sqrt{d_1} + \sqrt{d_2} + \sqrt{8 \log(32/\delta)} \right)^2}{n} \left( \sqrt{r} \|X^*\|_F + (1 + \epsilon) \sqrt{\frac{n \sigma^2}{d_1 \vee d_2}} \right)^2 \\ &= \left( \sqrt{\frac{d_1}{d_1 \vee d_2}} + \sqrt{\frac{d_2}{d_1 \vee d_2}} + \sqrt{\frac{8 \log(32/\delta)}{d_1 \vee d_2}} \right)^2 \left( \sqrt{\frac{r(d_1 \vee d_2)}{n}} + (1 + \epsilon) \frac{\sigma}{\|X^*\|_F} \right)^2 \|X^*\|_F^2 \end{aligned}$$

where  $\epsilon$  is the maximum of the two  $\epsilon$  in Theorem 1 and Theorem 4. Finally, recall that

$$L(\hat{X}) = \sigma^2 + \|\hat{X} - X^*\|_F^2.$$

Assuming that  $d_1 \leq d_2$ , then the above implies that

$$\begin{aligned} &\frac{\|\hat{X} - X^*\|_F^2}{\|X^*\|_F^2} \\ &\leq (1 - \epsilon)^{-1} (1 + \epsilon)^2 \left( 1 + \sqrt{\frac{d_1}{d_2}} + \sqrt{\frac{8 \log(32/\delta)}{d_2}} \right)^2 \left( \sqrt{\frac{r(d_1 + d_2)}{n}} + \frac{\sigma}{\|X^*\|_F} \right)^2 - \frac{\sigma^2}{\|X^*\|_F^2} \\ &\lesssim \frac{r(d_1 + d_2)}{n} + \sqrt{\frac{r(d_1 + d_2)}{n}} \frac{\sigma}{\|X^*\|_F} + \left( \sqrt{\frac{d_1}{d_2}} + \frac{n}{d_1 d_2} \right) \frac{\sigma^2}{\|X^*\|_F^2} \end{aligned}$$

and we are done.  $\square$

## E Counterexample to Gaussian Universality

By assumption (G), we can write  $x_{i|d-k} = h(x_{i|k}) \cdot \sum_{|d-k}^{1/2} z_i$  where  $z_i \sim \mathcal{N}(0, I_{d-k})$ . We will denote the matrix  $Z = [z_1, \dots, z_n]^T \in \mathbb{R}^{n \times (d-k)}$ . Following the notation in section 7, we will also write  $X = [X_{|k}, X_{|d-k}]$  where  $X_{|k} \in \mathbb{R}^{n \times k}$  and  $X_{|d-k} \in \mathbb{R}^{n \times (d-k)}$ . The proofs in this section closely follows the proof of Theorem 6.

881 **Theorem 15.** Consider dataset  $(X, Y)$  drawn i.i.d. from the data distribution  $\mathcal{D}$  according to (G)  
 882 and (H), and fix any  $f : \mathbb{R} \times \mathcal{Y} \rightarrow \mathbb{R}_{\geq 0}$  such that  $\sqrt{f}$  is 1-Lipschitz for any  $y \in \mathcal{Y}$ . Fix any  $\delta > 0$   
 883 and suppose there exists  $\epsilon_\delta < 1$  and  $C_\delta : \mathbb{R}^{d-k} \rightarrow [0, \infty]$  such that

884 (i) with probability at least  $1 - \delta/2$  over  $(X, Y)$  and  $G \sim \mathcal{N}(0, I_n)$ , it holds uniformly over  
 885 all  $w_{|k} \in \mathbb{R}^k$  and  $\|w_{|d-k}\|_{\Sigma_{|d-k}} \in \mathbb{R}_{\geq 0}$  that

$$\frac{1}{n} \sum_{i=1}^n \frac{f(\langle w_{|k}, x_{i|k} \rangle + h(x_{i|k}) \|w_{|d-k}\|_{\Sigma_{|d-k}} G_i, y_i)}{h(x_{i|k})^2} \geq (1 - \epsilon_\delta) \mathbb{E}_{\mathcal{D}} \left[ \frac{f(\langle w, x \rangle, y)}{h(x_{|k})^2} \right]$$

886 (ii) with probability at least  $1 - \delta/2$  over  $z_{|d-k} \sim \mathcal{N}(0, \Sigma_{|d-k})$ , it holds uniformly over all  
 887  $w_{|d-k} \in \mathbb{R}^{d-k}$  that

$$\langle w_{|d-k}, z_{|d-k} \rangle \leq C_\delta(w_{|d-k}) \quad (75)$$

888 then with probability at least  $1 - \delta$ , it holds uniformly over all  $w \in \mathbb{R}^d$  that

$$(1 - \epsilon_\delta) \mathbb{E} \left[ \frac{f(\langle w, x \rangle, y)}{h(x_{|k})^2} \right] \leq \left( \frac{1}{n} \sum_{i=1}^n \frac{f(\langle w, x_i \rangle, y_i)}{h(x_{i|k})^2} + \frac{C_\delta(w_{|d-k})}{\sqrt{n}} \right)^2. \quad (76)$$

889 *Proof.* Note that

$$\langle w_{|d-k}, x_{i|d-k} \rangle = h(x_{i|k}) \cdot \langle w_{|d-k}, \Sigma_{|d-k}^{1/2} z_i \rangle$$

890 and so for any  $f : \mathbb{R} \times \mathcal{Y} \times \mathbb{R}^k \rightarrow \mathbb{R}$ , we can write

$$\begin{aligned} \Phi &:= \sup_{w \in \mathbb{R}^d} F(w) - \frac{1}{n} \sum_{i=1}^n f(\langle w, x_i \rangle, y_i, x_{i|k}) \\ &= \sup_{\substack{w \in \mathbb{R}^d, u \in \mathbb{R}^n \\ u = Z \Sigma_{|d-k}^{1/2} w_{|d-k}}} F(w) - \frac{1}{n} \sum_{i=1}^n f(\langle w_{|k}, x_{i|k} \rangle + h(x_{i|k}) u_i, y_i, x_{i|k}) \\ &= \sup_{w \in \mathbb{R}^d, u \in \mathbb{R}^n} \inf_{\lambda \in \mathbb{R}^n} \langle \lambda, Z \Sigma_{|d-k}^{1/2} w_{|d-k} - u \rangle + F(w) - \frac{1}{n} \sum_{i=1}^n f(\langle w_{|k}, x_{i|k} \rangle + h(x_{i|k}) u_i, y_i, x_{i|k}). \end{aligned}$$

891 By the same truncation argument used in Lemma 7, it suffices to consider the auxiliary problem:

$$\begin{aligned} \Psi &:= \sup_{w \in \mathbb{R}^d, u \in \mathbb{R}^n} \inf_{\lambda \in \mathbb{R}^n} \|\lambda\|_2 \langle H, \Sigma_{|d-k}^{1/2} w_{|d-k} \rangle + \langle G \| \Sigma_{|d-k}^{1/2} w_{|d-k} \|_2 - u, \lambda \rangle \\ &\quad + F(w) - \frac{1}{n} \sum_{i=1}^n f(\langle w_{|k}, x_{i|k} \rangle + h(x_{i|k}) u_i, y_i, x_{i|k}) \\ &= \sup_{w \in \mathbb{R}^d, u \in \mathbb{R}^n} \inf_{\lambda \geq 0} \lambda \left( \langle H, \Sigma_{|d-k}^{1/2} w_{|d-k} \rangle - \left\| G \| \Sigma_{|d-k}^{1/2} w_{|d-k} \|_2 - u \right\|_2 \right) \\ &\quad + F(w) - \frac{1}{n} \sum_{i=1}^n f(\langle w_{|k}, x_{i|k} \rangle + h(x_{i|k}) u_i, y_i, x_{i|k}) \end{aligned}$$

892 Therefore, it holds that

$$\begin{aligned} \Psi &= \sup_{\substack{w \in \mathbb{R}^d, u \in \mathbb{R}^n \\ \langle H, \Sigma_{|d-k}^{1/2} w_{|d-k} \rangle \geq \left\| G \| \Sigma_{|d-k}^{1/2} w_{|d-k} \|_2 - u \right\|_2}} F(w) - \frac{1}{n} \sum_{i=1}^n f(\langle w_{|k}, x_{i|k} \rangle + h(x_{i|k}) u_i, y_i, x_{i|k}) \\ &= \sup_{w \in \mathbb{R}^d} F(w) - \frac{1}{n} \inf_{\substack{u \in \mathbb{R}^n \\ \langle H, \Sigma_{|d-k}^{1/2} w_{|d-k} \rangle \geq \left\| G \| \Sigma_{|d-k}^{1/2} w_{|d-k} \|_2 - u \right\|_2}} \sum_{i=1}^n f(\langle w_{|k}, x_{i|k} \rangle + h(x_{i|k}) u_i, y_i, x_{i|k}). \end{aligned}$$

893 Next, we analyze the infimum term:

$$\begin{aligned}
& \inf_{u \in \mathbb{R}^n} \sum_{i=1}^n f(\langle w_{|k}, x_{i|k} \rangle + h(x_{i|k})u_i, y_i, x_{i|k}) \\
& \langle H, \Sigma_{|d-k}^{1/2} w_{|d-k} \rangle \geq \left\| G \|\Sigma_{|d-k}^{1/2} w_{|d-k}\|_2 - u \right\|_2 \\
& = \inf_{\substack{u \in \mathbb{R}^n \\ \|u\|_2 \leq \langle H, \Sigma_{|d-k}^{1/2} w_{|d-k} \rangle}} \sum_{i=1}^n f(\langle w_{|k}, x_{i|k} \rangle + h(x_{i|k}) \left( u_i + \|\Sigma_{|d-k}^{1/2} w_{|d-k}\|_2 G_i \right), y_i, x_{i|k}) \\
& = \inf_{u \in \mathbb{R}^n} \sup_{\lambda \geq 0} \lambda (\|u\|^2 - \langle H, \Sigma_{|d-k}^{1/2} w_{|d-k} \rangle^2) \\
& \quad + \sum_{i=1}^n f(\langle w_{|k}, x_{i|k} \rangle + h(x_{i|k}) \left( u_i + \|\Sigma_{|d-k}^{1/2} w_{|d-k}\|_2 G_i \right), y_i, x_{i|k}) \\
& \geq \sup_{\lambda \geq 0} \inf_{u \in \mathbb{R}^n} \lambda (\|u\|^2 - \langle H, \Sigma_{|d-k}^{1/2} w_{|d-k} \rangle^2) \\
& \quad + \sum_{i=1}^n f(\langle w_{|k}, x_{i|k} \rangle + h(x_{i|k}) \left( u_i + \|\Sigma_{|d-k}^{1/2} w_{|d-k}\|_2 G_i \right), y_i, x_{i|k}) \\
& = \sup_{\lambda \geq 0} -\lambda \langle H, \Sigma_{|d-k}^{1/2} w_{|d-k} \rangle^2 \\
& \quad + \sum_{i=1}^n \inf_{u_i \in \mathbb{R}} f(\langle w_{|k}, x_{i|k} \rangle + u_i + \|\Sigma_{|d-k}^{1/2} w_{|d-k}\|_2 h(x_{i|k}) G_i, y_i, x_{i|k}) + \frac{\lambda}{h(x_{i|k})^2} u_i^2.
\end{aligned}$$

894 Now suppose that  $f$  takes the form  $f(\hat{y}, y, x_{|k}) = \frac{1}{h(x_{|k})^2} \tilde{f}(\hat{y}, y)$  for some 1 square-root Lipschitz  $\tilde{f}$   
895 and by a union bound, it holds with probability at least  $1 - \delta$  that

$$\langle \Sigma_{|d-k}^{1/2} H, w_{|d-k} \rangle^2 \leq C_\delta (w_{|d-k})^2$$

$$\frac{1}{n} \sum_{i=1}^n \frac{1}{h(x_{i|k})^2} \tilde{f}(\langle w_{|k}, x_{i|k} \rangle + \|\Sigma_{|d-k}^{1/2} w_{|d-k}\|_2 h(x_{i|k}) G_i, y_i) \geq (1 - \epsilon_\delta) \mathbb{E} \left[ \frac{1}{h(x_{|k})^2} \tilde{f}(\langle w, x \rangle, y) \right],$$

896 then the above becomes

$$\begin{aligned}
& \sup_{\lambda \geq 0} -\lambda \langle \Sigma_{|d-k}^{1/2} H, w_{|d-k} \rangle^2 + \sum_{i=1}^n \frac{1}{h(x_{i|k})^2} \tilde{f}_\lambda(\langle w_{|k}, x_{i|k} \rangle + \|\Sigma_{|d-k}^{1/2} w_{|d-k}\|_2 h(x_{i|k}) G_i, y_i) \\
& \geq \sup_{\lambda \geq 0} -\lambda \langle \Sigma_{|d-k}^{1/2} H, w_{|d-k} \rangle^2 + \frac{\lambda}{\lambda + 1} \sum_{i=1}^n \frac{1}{h(x_{i|k})^2} \tilde{f}(\langle w_{|k}, x_{i|k} \rangle + \|\Sigma_{|d-k}^{1/2} w_{|d-k}\|_2 h(x_{i|k}) G_i, y_i) \\
& \geq \sup_{\lambda \geq 0} -\lambda C_\delta (w_{|d-k})^2 + \frac{\lambda}{\lambda + 1} (1 - \epsilon) n \mathbb{E} \left[ \frac{1}{h(x_{|k})^2} \tilde{f}(\langle w, x \rangle, y) \right] \\
& \geq n \left( \sqrt{(1 - \epsilon_\delta) \mathbb{E} \left[ \frac{1}{h(x_{|k})^2} \tilde{f}(\langle w, x \rangle, y) \right]} - \frac{C_\delta (w_{|d-k})}{\sqrt{n}} \right)_+^2
\end{aligned}$$

897 where we apply Lemma 8 in the last step. Then if we take

$$F(w) = \left( \sqrt{(1 - \epsilon_\delta) \mathbb{E} \left[ \frac{1}{h(x_{|k})^2} \tilde{f}(\langle w, x \rangle, y) \right]} - \frac{C_\delta (w_{|d-k})}{\sqrt{n}} \right)_+^2$$

898 then we have  $\Psi \leq 0$ . To summarize, we have shown

$$\left( \sqrt{(1 - \epsilon_\delta) \mathbb{E} \left[ \frac{1}{h(x_{|k})^2} \tilde{f}(\langle w, x \rangle, y) \right]} - \frac{C_\delta (w_{|d-k})}{\sqrt{n}} \right)_+^2 - \frac{1}{n} \sum_{i=1}^n \frac{1}{h(x_{i|k})^2} \tilde{f}(\langle w, x_i \rangle, y_i) \leq 0$$

899 which implies

$$\mathbb{E} \left[ \frac{1}{h(x_{|k})^2} \tilde{f}(\langle w, x \rangle, y) \right] \leq (1 - \epsilon_\delta)^{-1} \left( \frac{1}{n} \sum_{i=1}^n \frac{1}{h(x_{i|k})^2} \tilde{f}(\langle w, x_i \rangle, y_i) + \frac{C_\delta (w_{|d-k})}{\sqrt{n}} \right)^2. \quad \square$$

**Theorem 16.** Under assumptions (G) and (H), fix any  $w_{|k}^* \in \mathbb{R}^k$  and suppose for some  $\rho \in (0, 1)$ , it holds with probability at least  $1 - \delta/8$

$$\frac{1}{n} \sum_{i=1}^n \left( \frac{y_i - \langle w_{|k}^*, x_{i|k} \rangle}{h(x_{i|k})} \right)^2 \leq (1 + \rho) \cdot \mathbb{E} \left[ \left( \frac{y - \langle w_{|k}^*, x_{|k} \rangle}{h(x_{|k})} \right)^2 \right]. \quad (77)$$

Then with probability at least  $1 - \delta$ , for some  $\epsilon \lesssim \rho + \log(\frac{1}{\delta}) \left( \frac{1}{\sqrt{n}} + \frac{1}{\sqrt{R(\Sigma_{|d-k})}} + \frac{n}{R(\Sigma_{|d-k})} \right)$ , it holds that

$$\min_{w \in \mathbb{R}^d: \forall i, \langle w, x_i \rangle = y_i} \|w\|_2^2 \leq \|w_{|k}^*\|_2^2 + (1 + \epsilon) \frac{n \mathbb{E} \left[ \left( \frac{y - \langle w_{|k}^*, x_{|k} \rangle}{h(x_{|k})} \right)^2 \right]}{\text{Tr}(\Sigma_{|d-k})}. \quad (78)$$

*Proof.* Fix any  $w_{|k}^* \in \mathbb{R}^k$ , we observe that

$$\begin{aligned} \min_{w \in \mathbb{R}^d: \forall i, \langle w, x_i \rangle = y_i} \|w\|_2^2 &= \min_{w \in \mathbb{R}^d: \forall i, \langle w_{|k}, x_{i|k} \rangle + \langle w_{|d-k}, x_{i|d-k} \rangle = y_i} \|w_{|k}\|_2^2 + \|w_{|d-k}\|_2^2 \\ &\leq \|w_{|k}^*\|_2^2 + \min_{\substack{w_{|d-k} \in \mathbb{R}^{d-k}: \\ \forall i, \langle w_{|d-k}, x_{i|d-k} \rangle = y_i - \langle w_{|k}^*, x_{i|k} \rangle}} \|w_{|d-k}\|_2^2. \end{aligned}$$

Therefore, it is enough analyze

$$\Phi := \min_{\substack{w_{|d-k} \in \mathbb{R}^{d-k}: \\ \forall i, \langle w_{|d-k}, x_{i|d-k} \rangle = y_i - \langle w_{|k}^*, x_{i|k} \rangle}} \|w_{|d-k}\|_2 = \min_{\substack{w_{|d-k} \in \mathbb{R}^{d-k}: \\ \forall i, \langle w_{|d-k}, \Sigma_{|d-k}^{1/2} z_i \rangle = \frac{y_i - \langle w_{|k}^*, x_{i|k} \rangle}{h(x_{i|k})}}} \|w_{|d-k}\|_2.$$

By introducing the Lagrangian, we have

$$\begin{aligned} \Phi &= \min_{w_{|d-k} \in \mathbb{R}^{d-k}} \max_{\lambda \in \mathbb{R}^n} \sum_{i=1}^n \lambda_i \left( \langle \Sigma_{|d-k}^{1/2} w_{|d-k}, z_i \rangle - \frac{y_i - \langle w_{|k}^*, x_{i|k} \rangle}{h(x_{i|k})} \right) + \|w_{|d-k}\|_2 \\ &= \min_{w_{|d-k} \in \mathbb{R}^{d-k}} \max_{\lambda \in \mathbb{R}^n} \langle \lambda, Z \Sigma_{|d-k}^{1/2} w_{|d-k} \rangle - \sum_{i=1}^n \lambda_i \left( \frac{y_i - \langle w_{|k}^*, x_{i|k} \rangle}{h(x_{i|k})} \right) + \|w_{|d-k}\|_2. \end{aligned}$$

Similarly, the above is only random in  $Z$  after conditioning on  $X_{|k} w_{|k}^*$  and  $\xi$  and the distribution of  $Z$  remains unchanged after conditioning because of the independence. By the same truncation argument as before and CGMT, it suffices to consider the auxiliary problem:

$$\begin{aligned} &\min_{w_{|d-k} \in \mathbb{R}^{d-k}} \max_{\lambda \in \mathbb{R}^n} \|\lambda\|_2 \langle H, \Sigma_{|d-k}^{1/2} w_{|d-k} \rangle + \sum_{i=1}^n \lambda_i \left( \|\Sigma_{|d-k}^{1/2} w_{|d-k}\|_2 G_i - \frac{y_i - \langle w_{|k}^*, x_{i|k} \rangle}{h(x_{i|k})} \right) \\ &\quad + \|w_{|d-k}\|_2 \\ &= \min_{w_{|d-k} \in \mathbb{R}^{d-k}} \max_{\lambda \in \mathbb{R}^n} \|\lambda\|_2 \left( \langle H, \Sigma_{|d-k}^{1/2} w_{|d-k} \rangle + \sqrt{\sum_{i=1}^n \left( \|\Sigma_{|d-k}^{1/2} w_{|d-k}\|_2 G_i - \frac{y_i - \langle w_{|k}^*, x_{i|k} \rangle}{h(x_{i|k})} \right)^2} \right) \\ &\quad + \|w_{|d-k}\|_2 \end{aligned}$$

and so we can define

$$\Psi := \min_{w_{|d-k} \in \mathbb{R}^{d-k}} \|\lambda\|_2 \left( \langle H, \Sigma_{|d-k}^{1/2} w_{|d-k} \rangle + \sqrt{\sum_{i=1}^n \left( \|\Sigma_{|d-k}^{1/2} w_{|d-k}\|_2 G_i - \frac{y_i - \langle w_{|k}^*, x_{i|k} \rangle}{h(x_{i|k})} \right)^2} \right) + \langle -\Sigma_{|d-k}^{1/2} H, w_{|d-k} \rangle$$

To upper bound  $\Psi$ , we consider  $w_{|d-k}$  of the form  $-\alpha \frac{\Sigma_{|d-k}^{1/2} H}{\|\Sigma_{|d-k}^{1/2} H\|_2}$ , then we just need

$$\sum_{i=1}^n \left( \alpha \frac{\|\Sigma_{|d-k} H\|_2}{\|\Sigma_{|d-k}^{1/2} H\|_2} G_i - \frac{y_i - \langle w_{|k}^*, x_{i|k} \rangle}{h(x_{i|k})} \right)^2 \leq \alpha^2 \|\Sigma_{|d-k}^{1/2} H\|_2^2.$$

912 By a union bound, the following occur together with probability at least  $1 - \delta/2$  for some absolute  
 913 constant  $C > 0$ :

914 1. Using the first part of Lemma 4, we have

$$\|\Sigma_{|d-k}^{1/2} H\|_2^2 \geq \text{Tr}(\Sigma_{|d-k}) \left(1 - C \frac{\log(32/\delta)}{\sqrt{R(\Sigma_{|d-k})}}\right)$$

915 2. Using the last part of Lemma 4, requiring  $R(\Sigma_{|d-k}) \gtrsim \log(32/\delta)^2$

$$\frac{\|\Sigma_{|d-k} H\|_2^2}{\|\Sigma_{|d-k}^{1/2} H\|_2^2} \leq C \log(32/\delta) \frac{\text{Tr}(\Sigma_{|d-k}^2)}{\text{Tr}(\Sigma_{|d-k})}$$

916 3. Using subexponential Bernstein's inequality (Theorem 2.8.1 of Vershynin (2018)), requiring  
 917  $n = \Omega(\log(1/\delta))$ ,

$$\frac{1}{n} \sum_{i=1}^n G_i^2 \leq 2$$

918 4. Using standard Gaussian tail bound  $\Pr(|Z| \geq t) \leq 2e^{-t^2/2}$ , we have

$$\left| \frac{1}{n} \sum_{i=1}^n \frac{G_i(y_i - \langle w_{|k}^*, x_{i|k} \rangle)}{h(x_{i|k})} \right| \leq \sqrt{\frac{1}{n} \sum_{i=1}^n \left( \frac{y_i - \langle w_{|k}^*, x_{i|k} \rangle}{h(x_{i|k})} \right)^2} \sqrt{\frac{2 \log(32/\delta)}{n}}$$

919 5. By assumption, it holds that

$$\frac{1}{n} \sum_{i=1}^n \left( \frac{y_i - \langle w_{|k}^*, x_{i|k} \rangle}{h(x_{i|k})} \right)^2 \leq (1 + \rho) \cdot \mathbb{E} \left[ \left( \frac{y - \langle w_{|k}^*, x_{|k} \rangle}{h(x_{|k})} \right)^2 \right].$$

920 Then we use the above and the AM-GM inequality to show that

$$\begin{aligned} & \frac{1}{n} \sum_{i=1}^n \left( \alpha \frac{\|\Sigma_{|d-k} H\|_2}{\|\Sigma_{|d-k}^{1/2} H\|_2} G_i - \frac{y_i - \langle w_{|k}^*, x_{i|k} \rangle}{h(x_{i|k})} \right)^2 \\ & \leq 2\alpha^2 \frac{\|\Sigma_{|d-k} H\|_2^2}{\|\Sigma_{|d-k}^{1/2} H\|_2^2} + (1 + \rho) \cdot \mathbb{E} \left[ \left( \frac{y - \langle w_{|k}^*, x_{|k} \rangle}{h(x_{|k})} \right)^2 \right] \\ & \quad + 2 \frac{\alpha \|\Sigma_{|d-k} H\|_2}{\|\Sigma_{|d-k}^{1/2} H\|_2} \sqrt{(1 + \rho) \cdot \mathbb{E} \left[ \left( \frac{y - \langle w_{|k}^*, x_{|k} \rangle}{h(x_{|k})} \right)^2 \right]} \sqrt{\frac{2 \log(32/\delta)}{n}} \\ & \leq C \log(32/\delta) \left( 2 + \sqrt{\frac{2 \log(32/\delta)}{n}} \right) \alpha^2 \frac{\text{Tr}(\Sigma_{|d-k}^2)}{\text{Tr}(\Sigma_{|d-k})} \\ & \quad + \left( 1 + \sqrt{\frac{2 \log(32/\delta)}{n}} \right) (1 + \rho) \cdot \mathbb{E} \left[ \left( \frac{y - \langle w_{|k}^*, x_{|k} \rangle}{h(x_{|k})} \right)^2 \right]. \end{aligned}$$

921 After some rearrangements, it is easy to see that we can choose

$$\alpha^2 = \frac{\left( 1 + \sqrt{\frac{2 \log(32/\delta)}{n}} \right) (1 + \rho)}{1 - C \frac{\log(32/\delta)}{\sqrt{R(\Sigma_{|d-k})}} - C \log(32/\delta) \left( 2 + \sqrt{\frac{2 \log(32/\delta)}{n}} \right) \frac{n}{R(\Sigma_{|d-k})}} \frac{n \mathbb{E} \left[ \left( \frac{y - \langle w_{|k}^*, x_{|k} \rangle}{h(x_{|k})} \right)^2 \right]}{\text{Tr}(\Sigma_{|d-k})}.$$

922 and the proof is complete.  $\square$
